# Supplementary material
Source: MDPI journal article supplement (https://www.mdpi.com/2073-8994/13/5/766)
Supplement: s1 [file s1]

# Supporting Information

for the paper:

## Cooperation/Competition Between Halogen Bonds and Hydrogen Bonds in Complexes of 2,6-diaminopyridine and X-CY<sub>3</sub> (X = Cl, Br; Y = H, F)

Barbara Bankiewicz<sup>1,2,\*</sup> and Marcin Palusiak<sup>2,\*</sup>

<sup>1</sup> *Department of Structural Chemistry, Faculty of Chemistry, University of Białystok, Ciołkowskiego 1K, 15-245 Białystok, Poland*      *E-mail: b.bankiewicz@uwb.edu.pl*

<sup>2</sup> *Department of Physical Chemistry, Faculty of Chemistry, University of Łódź, Pomorska 163/165, 91-236 Łódź, Poland*      *E-mail: marcin.palusiak@chemia.uni.lodz.pl*

### Contents:

|                       |                                                                                                                                                                                                                                                                                                                                                                                                                            |
|-----------------------|----------------------------------------------------------------------------------------------------------------------------------------------------------------------------------------------------------------------------------------------------------------------------------------------------------------------------------------------------------------------------------------------------------------------------|
| <b>Page S2:</b>       | <b>Table S1.</b> Cartesian coordinates of calculated geometries of the halogen bonded complexes of pyridine with 4-chloro-2,3,5,6-tetrafluoropyridine (CSD refcode: FOFZUY) and 4-bromo-2,3,5,6-tetrafluoropyridine (CSD refcode: FOFZOS).                                                                                                                                                                                 |
| <b>Page S3:</b>       | <b>Figure S1.</b> The orientation of dipole moment vectors of the fragments of selected complexes.<br><b>Table S2.</b> Dipole moments of the fragments of [R-PDA][X-CY <sub>3</sub> ] and [R-Pyr][X-CY <sub>3</sub> ] complexes (ωB97X-D/6-311++G(d,p) level of theory).                                                                                                                                                   |
| <b>Page S4:</b>       | <b>Table S3.</b> Bond lengths and selected topological parameters of distribution of electron density [a.u.] in bonds critical points for [PDA][X-CY <sub>3</sub> ] and [Pyr][X-CY <sub>3</sub> ] complexes.                                                                                                                                                                                                               |
| <b>Page S5:</b>       | <b>Table S4.</b> Bond lengths and selected topological parameters of distribution of electron density [a.u.] in bonds critical points for [ON-PDA][X-CY <sub>3</sub> ] and [ON-Pyr][X-CY <sub>3</sub> ] complexes.                                                                                                                                                                                                         |
| <b>Page S6:</b>       | <b>Table S5.</b> Bond lengths and selected topological parameters of distribution of electron density [a.u.] in bonds critical points for [O <sub>2</sub> N-PDA][X-CY <sub>3</sub> ] and [O <sub>2</sub> N-Pyr][X-CY <sub>3</sub> ] complexes.                                                                                                                                                                             |
| <b>Page S7:</b>       | <b>Table S6.</b> Bond lengths and selected topological parameters of distribution of electron density [a.u.] in bonds critical points for [HO-PDA][X-CY <sub>3</sub> ] and [HO-Pyr][X-CY <sub>3</sub> ] complexes.                                                                                                                                                                                                         |
| <b>Page S8:</b>       | <b>Table S7.</b> Bond lengths and selected topological parameters of distribution of electron density [a.u.] in bonds critical points for [H <sub>2</sub> N-PDA][X-CY <sub>3</sub> ] and [H <sub>2</sub> N-Pyr][X-CY <sub>3</sub> ] complexes.                                                                                                                                                                             |
| <b>Page S9:</b>       | <b>Table S8.</b> Fluctuations of the electron density values at the critical points of halogen and hydrogen bonds in complexes of the [R-PDA][X-CY <sub>3</sub> ] in relation to [PDA][X-CY <sub>3</sub> ].<br><b>Table S9.</b> Fluctuations of the electron density values at the critical points of halogen and hydrogen bonds in complexes of the [R-Pyr][X-CY <sub>3</sub> ] in relation to [Pyr][X-CY <sub>3</sub> ]. |
| <b>Page S10:</b>      | <b>Table S10.</b> Fluctuations of the total interaction energy values of the [R-PDA][X-CY <sub>3</sub> ] and [R-Pyr][X-CY <sub>3</sub> ] complexes in relation to [PDA][X-CY <sub>3</sub> ] and [Pyr][X-CY <sub>3</sub> ].                                                                                                                                                                                                 |
| <b>Pages S11-S23:</b> | <b>Table S11.</b> Cartesian coordinates of calculated geometries of the studied complexes.                                                                                                                                                                                                                                                                                                                                 |

**Table S1.** Cartesian coordinates of calculated geometries of the halogen bonded complexes of pyridine with 4-chloro-2,3,5,6-tetrafluoropyridine (CSD refcode: FOFZUY) and 4-bromo-2,3,5,6-tetrafluoropyridine (CSD refcode: FOFZOS). Geometries optimized at  $\omega$ B97X-D/6-311++G level of theory.

|                                                                                                                      |  |                        |             |             |             |
|----------------------------------------------------------------------------------------------------------------------|--|------------------------|-------------|-------------|-------------|
| FOFZUY                                                                                                               |  | Cartesian coordinates: |             |             |             |
| E= -1352.71750066 a.u.                                                                                               |  | Cl                     | -0.33426200 | -0.51691800 | -0.25302400 |
| 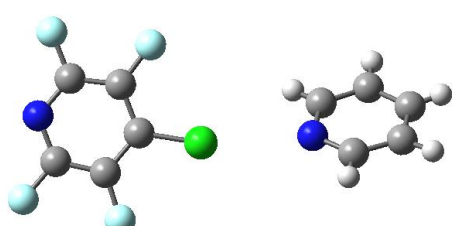 <p>Graphical representation.</p>   |  | F                      | 3.61569400  | 2.58385900  | -0.18703500 |
|                                                                                                                      |  | F                      | 0.96179600  | 2.13321800  | -0.39627300 |
|                                                                                                                      |  | F                      | 1.88488500  | -2.47066800 | 0.18889700  |
|                                                                                                                      |  | F                      | 4.49141900  | -1.80910200 | 0.42113500  |
|                                                                                                                      |  | N                      | 4.04077400  | 0.38457100  | 0.12735600  |
|                                                                                                                      |  | C                      | 3.15471800  | 1.33393800  | -0.07281100 |
|                                                                                                                      |  | C                      | 1.79642600  | 1.11707200  | -0.19559800 |
|                                                                                                                      |  | C                      | 1.32531600  | -0.18621200 | -0.10964500 |
|                                                                                                                      |  | C                      | 2.25701400  | -1.19646200 | 0.09847100  |
|                                                                                                                      |  | C                      | 3.59118000  | -0.84494200 | 0.21335300  |
|                                                                                                                      |  | N                      | -3.33415400 | -0.41786800 | -0.34165900 |
|                                                                                                                      |  | C                      | -4.45693500 | -0.99021000 | -0.79782400 |
|                                                                                                                      |  | H                      | -4.37486900 | -1.71376100 | -1.35531200 |
|                                                                                                                      |  | C                      | -5.72821700 | -0.59956100 | -0.41039600 |
|                                                                                                                      |  | H                      | -6.58060000 | -0.98360000 | -0.78184000 |
|                                                                                                                      |  | C                      | -5.86401900 | 0.42993000  | 0.50938100  |
|                                                                                                                      |  | H                      | -6.67367800 | 0.76598400  | 0.74918400  |
|                                                                                                                      |  | C                      | -4.71185500 | 1.04345500  | 0.98974900  |
|                                                                                                                      |  | H                      | -4.76742600 | 1.82754200  | 1.58565900  |
|                                                                                                                      |  | C                      | -3.48610800 | 0.59089000  | 0.52880900  |
|                                                                                                                      |  | H                      | -2.71658200 | 1.00136800  | 0.84240200  |
| FOFZOS                                                                                                               |  | Cartesian coordinates: |             |             |             |
| E=-3466.62211751 a.u.                                                                                                |  | Br                     | -0.42017700 | -0.30121800 | -0.42672900 |
|  <p>Graphical representation.</p> |  | F                      | 3.95295600  | 2.47255400  | -0.00828800 |
|                                                                                                                      |  | F                      | 1.28670900  | 2.26887100  | -0.45529000 |
|                                                                                                                      |  | F                      | 1.75082100  | -2.41233400 | 0.16654500  |
|                                                                                                                      |  | F                      | 4.36841800  | -1.97445600 | 0.65530700  |
|                                                                                                                      |  | N                      | 4.14627500  | 0.24914200  | 0.32269900  |
|                                                                                                                      |  | C                      | 3.36696900  | 1.26969600  | 0.04229900  |
|                                                                                                                      |  | C                      | 2.01495200  | 1.16357200  | -0.19729900 |
|                                                                                                                      |  | C                      | 1.42303400  | -0.08406300 | -0.15944800 |
|                                                                                                                      |  | C                      | 2.24044600  | -1.16489500 | 0.11825900  |
|                                                                                                                      |  | C                      | 3.57734400  | -0.93233500 | 0.35803300  |
|                                                                                                                      |  | N                      | -3.30592600 | -0.21538200 | -0.31731500 |
|                                                                                                                      |  | C                      | -4.38196200 | -0.93812100 | -0.63482200 |
|                                                                                                                      |  | H                      | -4.25671100 | -1.70973800 | -1.22555900 |
|                                                                                                                      |  | C                      | -5.65728700 | -0.66858500 | -0.15350800 |
|                                                                                                                      |  | H                      | -6.36286800 | -1.21920600 | -0.37554300 |
|                                                                                                                      |  | C                      | -5.82553200 | 0.40735000  | 0.70900600  |
|                                                                                                                      |  | H                      | -6.57645000 | 0.59456400  | 1.02550200  |
|                                                                                                                      |  | C                      | -4.72255000 | 1.16034500  | 1.04496400  |
|                                                                                                                      |  | H                      | -4.76739300 | 1.91439000  | 1.59517200  |
|                                                                                                                      |  | C                      | -3.49140600 | 0.82391700  | 0.51589000  |
|                                                                                                                      |  | H                      | -2.70700600 | 1.31328700  | 0.79354400  |

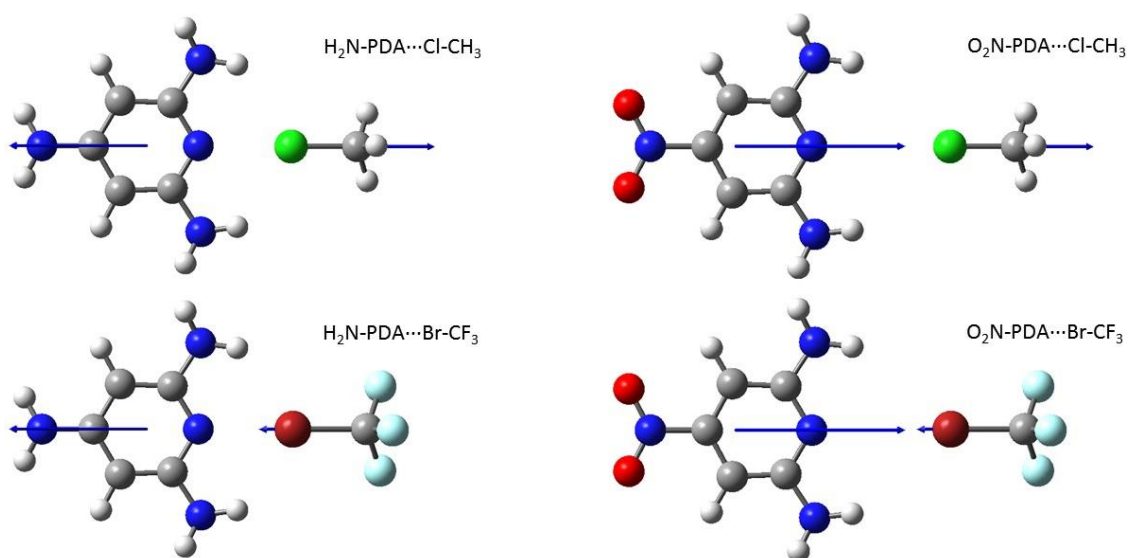

**Figure S1.** The orientation of dipole moment vectors of the fragments of selected complexes.

**Table S2.** Dipole moments of the fragments of [R-PDA][X-CY<sub>3</sub>] and [R-Pyr][X-CY<sub>3</sub>] complexes ( $\omega$ B97X-D/6-311++G(d,p) level of theory). The dipole moments are given in Debye.

| Molecule             | $\mu$  |
|----------------------|--------|
| H <sub>2</sub> N-PDA | 2.0224 |
| HO-PDA               | 2.1531 |
| H-PDA                | 1.762  |
| ON-PDA               | 3.5606 |
| O <sub>2</sub> N-PDA | 4.6831 |
| H <sub>2</sub> N-Pyr | 4.042  |
| HO-Pyr               | 2.7791 |
| H-Pyr                | 2.3834 |
| ON-Pyr               | 0.8736 |
| O <sub>2</sub> N-Pyr | 2.0883 |
| Cl-CH <sub>3</sub>   | 2.1135 |
| Br-CH <sub>3</sub>   | 2.0086 |
| Cl-CF <sub>3</sub>   | 0.4602 |
| Br-CF <sub>3</sub>   | 0.6704 |

**Table S3.** Bond lengths and selected topological parameters of distribution of electron density [a.u.] in bonds critical points for [PDA][X–CY<sub>3</sub>] and [Pyr][X–CY<sub>3</sub>] complexes. Electron density –  $\rho_{\text{BCP}}$ , the Laplacian of the electron density –  $\nabla^2\rho_{\text{BCP}}$ , potential energy density –  $V_{\text{BCP}}$ , kinetic energy density –  $G_{\text{BCP}}$ , and total energy density –  $H_{\text{BCP}}$ .

| DIMER                 | BCP           | d [Å]  | $\rho_{\text{BCP}}$ | $\nabla^2\rho_{\text{BCP}}$ | $V_{\text{BCP}}$ | $G_{\text{BCP}}$ | $H_{\text{BCP}}$ |
|-----------------------|---------------|--------|---------------------|-----------------------------|------------------|------------------|------------------|
| PDA-ClCF <sub>3</sub> | <i>N···Cl</i> | 3.057  | 1.19E-02            | 4.02E-02                    | -7.36E-03        | 8.71E-03         | 1.35E-03         |
|                       | <i>H···Cl</i> | 2.967* | -                   | -                           | -                | -                | -                |
|                       | <i>H···Cl</i> | 2.964* | -                   | -                           | -                | -                | -                |
| PDA-ClCH <sub>3</sub> | <i>N···Cl</i> | 3.218  | 8.67E-03            | 2.99E-02                    | -5.15E-03        | 6.31E-03         | 1.16E-03         |
|                       | <i>H···Cl</i> | 3.065* | 3.74E-03            | 1.36E-02                    | -1.86E-03        | 2.63E-03         | 7.69E-04         |
|                       | <i>H···Cl</i> | 3.065* | 3.74E-03            | 1.36E-02                    | -1.86E-03        | 2.63E-03         | 7.69E-04         |
| PDA-BrCF <sub>3</sub> | <i>N···Br</i> | 2.989  | 1.59E-02            | 4.79E-02                    | -9.51E-03        | 1.07E-02         | 1.24E-03         |
|                       | <i>H···Br</i> | 2.936  | 5.92E-03            | 2.03E-02                    | -2.98E-03        | 4.03E-03         | 1.05E-03         |
|                       | <i>H···Br</i> | 2.937  | 5.91E-03            | 2.03E-02                    | -2.98E-03        | 4.03E-03         | 1.05E-03         |
| PDA-BrCH <sub>3</sub> | <i>N···Br</i> | 3.171  | 1.12E-02            | 3.49E-02                    | -6.47E-03        | 7.60E-03         | 1.13E-03         |
|                       | <i>H···Br</i> | 3.038  | 4.94E-03            | 1.63E-02                    | -2.38E-03        | 3.23E-03         | 8.53E-04         |
|                       | <i>H···Br</i> | 3.038  | 4.94E-03            | 1.63E-02                    | -2.38E-03        | 3.23E-03         | 8.53E-04         |
| Pyr-ClCF <sub>3</sub> | <i>N···Cl</i> | 2.985  | 1.32E-02            | 4.65E-02                    | -8.46E-03        | 1.00E-02         | 1.58E-03         |
| Pyr-ClCH <sub>3</sub> | <i>N···Cl</i> | 3.402* | 5.43E-03            | 2.02E-02                    | -3.10E-03        | 4.07E-03         | 9.68E-04         |
|                       | <i>H···Cl</i> | 3.034* | 4.86E-03            | 1.76E-02                    | -2.51E-03        | 3.45E-03         | 9.43E-04         |
| Pyr-BrCF <sub>3</sub> | <i>N···Br</i> | 2.915  | 1.77E-02            | 5.57E-02                    | -1.10E-02        | 1.25E-02         | 1.44E-03         |
| Pyr-BrCH <sub>3</sub> | <i>N···Br</i> | 3.148  | 1.12E-02            | 3.64E-02                    | -6.62E-03        | 7.86E-03         | 1.24E-03         |

\* the length of interatomic contacts larger than the sum of van der Waals radii of interacting atoms

**Table S4.** Bond lengths and selected topological parameters of distribution of electron density [a.u.] in bonds critical points for [ON-PDA][X-CY<sub>3</sub>] and [ON-Pyr][X-CY<sub>3</sub>] complexes.

| DIMER                    | BCP           | d [Å]  | $\rho_{BCP}$ | $\nabla^2\rho_{BCP}$ | $V_{BCP}$ | $G_{BCP}$ | $H_{BCP}$ |
|--------------------------|---------------|--------|--------------|----------------------|-----------|-----------|-----------|
| ON-PDA-ClCF <sub>3</sub> | <i>N...Cl</i> | 3.078  | 1.14E-02     | 3.86E-02             | -6.99E-03 | 8.33E-03  | 1.33E-03  |
|                          | <i>H...Cl</i> | 2.971* | 4.32E-03     | 1.64E-02             | -2.24E-03 | 3.17E-03  | 9.28E-04  |
|                          | <i>H...Cl</i> | 2.987* | -            | -                    | -         | -         | -         |
| ON-PDA-ClCH <sub>3</sub> | <i>N...Cl</i> | 3.220  | 8.63E-03     | 2.99E-02             | -5.14E-03 | 6.30E-03  | 1.17E-03  |
|                          | <i>H...Cl</i> | 2.978* | 4.39E-03     | 1.55E-02             | -2.14E-03 | 3.00E-03  | 8.64E-04  |
|                          | <i>H...Cl</i> | 3.134* | -            | -                    | -         | -         | -         |
| ON-PDA-BrCF <sub>3</sub> | <i>N...Br</i> | 3.026  | 1.47E-02     | 4.49E-02             | -8.76E-03 | 9.99E-03  | 1.24E-03  |
|                          | <i>H...Br</i> | 2.949  | 5.74E-03     | 1.97E-02             | -2.86E-03 | 3.88E-03  | 1.03E-03  |
|                          | <i>H...Br</i> | 2.969  | 5.50E-03     | 1.90E-02             | -2.76E-03 | 3.75E-03  | 9.92E-04  |
| ON-PDA-BrCH <sub>3</sub> | <i>N...Br</i> | 3.180  | 1.10E-02     | 3.45E-02             | -6.36E-03 | 7.49E-03  | 1.13E-03  |
|                          | <i>H...Br</i> | 3.025  | 5.05E-03     | 1.66E-02             | -2.40E-03 | 3.27E-03  | 8.72E-04  |
|                          | <i>H...Br</i> | 3.052  | 4.77E-03     | 1.58E-02             | -2.28E-03 | 3.12E-03  | 8.36E-04  |
| ON-Pyr-ClCF <sub>3</sub> | <i>N...Cl</i> | 3.029  | 1.20E-02     | 4.25E-02             | -7.59E-03 | 9.11E-03  | 1.52E-03  |
| ON-Pyr-ClCH <sub>3</sub> | <i>N...Cl</i> | 3.518* | 4.24E-03     | 1.62E-02             | -2.39E-03 | 3.22E-03  | 8.36E-04  |
|                          | <i>H...Cl</i> | 2.962* | 5.50E-03     | 1.90E-02             | -2.77E-03 | 3.76E-03  | 9.91E-04  |
| ON-Pyr-BrCF <sub>3</sub> | <i>N...Br</i> | 2.962  | 1.61E-02     | 5.12E-02             | -9.89E-03 | 1.13E-02  | 1.45E-03  |
| ON-Pyr-BrCH <sub>3</sub> | <i>N...Br</i> | 3.176  | 1.05E-02     | 3.45E-02             | -6.18E-03 | 7.40E-03  | 1.23E-03  |

\* the length of interatomic contacts larger than the sum of van der Waals radii of interacting atoms

**Table S5.** Bond lengths and selected topological parameters of distribution of electron density [a.u.] in bonds critical points for [O<sub>2</sub>N-PDA][X-CY<sub>3</sub>] and [O<sub>2</sub>N-Pyr][X-CY<sub>3</sub>] complexes.

| DIMER                                      | BCP           | d [Å]  | $\rho_{\text{BCP}}$ | $\nabla^2\rho_{\text{BCP}}$ | $V_{\text{BCP}}$ | $G_{\text{BCP}}$ | $H_{\text{BCP}}$ |
|--------------------------------------------|---------------|--------|---------------------|-----------------------------|------------------|------------------|------------------|
| <b>O<sub>2</sub>N-PDA-ClCF<sub>3</sub></b> | <i>N...Cl</i> | 3.073  | 1.12E-02            | 3.86E-02                    | -6.93E-03        | 8.30E-03         | 1.36E-03         |
|                                            | <i>H...Cl</i> | 3.046* | -                   | -                           | -                | -                | -                |
|                                            | <i>H...Cl</i> | 3.046* | -                   | -                           | -                | -                | -                |
| <b>O<sub>2</sub>N-PDA-ClCH<sub>3</sub></b> | <i>N...Cl</i> | 3.211  | 8.73E-03            | 3.03E-02                    | -5.22E-03        | 6.40E-03         | 1.18E-03         |
|                                            | <i>H...Cl</i> | 3.066* | 3.71E-03            | 1.35E-02                    | -1.84E-03        | 2.61E-03         | 7.68E-04         |
|                                            | <i>H...Cl</i> | 3.066* | 3.72E-03            | 1.35E-02                    | -1.84E-03        | 2.61E-03         | 7.68E-04         |
| <b>O<sub>2</sub>N-PDA-BrCF<sub>3</sub></b> | <i>N...Br</i> | 3.030  | 1.44E-02            | 4.45E-02                    | -8.60E-03        | 9.86E-03         | 1.26E-03         |
|                                            | <i>H...Br</i> | 2.992  | 5.32E-03            | 1.85E-02                    | -2.69E-03        | 3.65E-03         | 9.63E-04         |
|                                            | <i>H...Br</i> | 2.990  | 5.34E-03            | 1.85E-02                    | -2.69E-03        | 3.66E-03         | 9.67E-04         |
| <b>O<sub>2</sub>N-PDA-BrCH<sub>3</sub></b> | <i>N...Br</i> | 3.179  | 1.09E-02            | 3.46E-02                    | -6.36E-03        | 7.51E-03         | 1.14E-03         |
|                                            | <i>H...Br</i> | 3.051  | 4.81E-03            | 1.59E-02                    | -2.30E-03        | 3.14E-03         | 8.40E-04         |
|                                            | <i>H...Br</i> | 3.052  | 4.80E-03            | 1.59E-02                    | -2.30E-03        | 3.14E-03         | 8.39E-04         |
| <b>O<sub>2</sub>N-Pyr-ClCF<sub>3</sub></b> | <i>N...Cl</i> | 3.043  | 1.16E-02            | 4.14E-02                    | -7.33E-03        | 8.84E-03         | 1.51E-03         |
| <b>O<sub>2</sub>N-Pyr-ClCH<sub>3</sub></b> | <i>N...Cl</i> | 3.461* | 4.76E-03            | 1.79E-02                    | -2.69E-03        | 3.59E-03         | 9.00E-04         |
|                                            | <i>H...Cl</i> | 3.018* | 4.94E-03            | 1.75E-02                    | -2.50E-03        | 3.44E-03         | 9.40E-04         |
| <b>O<sub>2</sub>N-Pyr-BrCF<sub>3</sub></b> | <i>N...Br</i> | 2.974  | 1.57E-02            | 5.01E-02                    | -9.61E-03        | 1.11E-02         | 1.45E-03         |
| <b>O<sub>2</sub>N-Pyr-BrCH<sub>3</sub></b> | <i>N...Br</i> | 3.178  | 1.80E-02            | 5.67E-02                    | -1.13E-02        | 1.27E-02         | 1.46E-03         |

\* the length of interatomic contacts larger than the sum of van der Waals radii of interacting atoms

**Table S6.** Bond lengths and selected topological parameters of distribution of electron density [a.u.] in bonds critical points for [HO-PDA][X-CY<sub>3</sub>] and [HO-Pyr][X-CY<sub>3</sub>] complexes.

| DIMER                    | BCP           | d [Å]  | $\rho_{\text{BCP}}$ | $\nabla^2\rho_{\text{BCP}}$ | $V_{\text{BCP}}$ | $G_{\text{BCP}}$ | $H_{\text{BCP}}$ |
|--------------------------|---------------|--------|---------------------|-----------------------------|------------------|------------------|------------------|
| HO-PDA-ClCF <sub>3</sub> | <i>N...Cl</i> | 3.028  | 1.21E-02            | 4.18E-02                    | -7.60E-03        | 9.02E-03         | 1.42E-03         |
|                          | <i>H...Cl</i> | 3.083* | -                   | -                           | -                | -                | -                |
|                          | <i>H...Cl</i> | 3.086* | -                   | -                           | -                | -                | -                |
| HO-PDA-ClCH <sub>3</sub> | <i>N...Cl</i> | 3.214  | 8.73E-03            | 3.01E-02                    | -5.20E-03        | 6.36E-03         | 1.17E-03         |
|                          | <i>H...Cl</i> | 3.057* | 3.79E-03            | 1.38E-02                    | -1.89E-03        | 2.66E-03         | 7.78E-04         |
|                          | <i>H...Cl</i> | 3.081* | -                   | -                           | -                | -                | -                |
| HO-PDA-BrCF <sub>3</sub> | <i>N...Br</i> | 2.979  | 1.61E-02            | 4.89E-02                    | -9.70E-03        | 1.10E-02         | 1.26E-03         |
|                          | <i>H...Br</i> | 2.940  | 5.98E-03            | 2.05E-02                    | -3.02E-03        | 4.07E-03         | 1.05E-03         |
|                          | <i>H...Br</i> | 2.932  | 5.87E-03            | 2.02E-02                    | -2.98E-03        | 4.01E-03         | 1.04E-03         |
| HO-PDA-BrCH <sub>3</sub> | <i>N...Br</i> | 3.166  | 1.12E-02            | 3.52E-02                    | -6.53E-03        | 7.67E-03         | 1.14E-03         |
|                          | <i>H...Br</i> | 3.042  | 4.92E-03            | 1.63E-02                    | -2.37E-03        | 3.22E-03         | 8.50E-04         |
|                          | <i>H...Br</i> | 3.050  | 4.84E-03            | 1.61E-02                    | -2.34E-03        | 3.18E-03         | 8.42E-04         |
| HO-Pyr-ClCF <sub>3</sub> | <i>N...Cl</i> | 2.974  | 1.34E-02            | 4.74E-02                    | -8.66E-03        | 1.03E-02         | 1.60E-03         |
| HO-Pyr-ClCH <sub>3</sub> | <i>N...Cl</i> | 3.425* | 5.18E-03            | 1.93E-02                    | -2.94E-03        | 3.87E-03         | 9.39E-04         |
|                          | <i>H...Cl</i> | 3.031* | 4.88E-03            | 1.75E-02                    | -2.50E-03        | 3.44E-03         | 9.36E-04         |
| HO-Pyr-BrCF <sub>3</sub> | <i>N...Br</i> | 2.905  | 1.80E-02            | 5.67E-02                    | -1.13E-02        | 1.27E-02         | 1.46E-03         |
| HO-Pyr-BrCH <sub>3</sub> | <i>N...Br</i> | 3.148  | 1.12E-02            | 3.63E-02                    | -6.59E-03        | 7.84E-03         | 1.25E-03         |

\* the length of interatomic contacts larger than the sum of van der Waals radii of interacting atoms

**Table S7.** Bond lengths and selected topological parameters of distribution of electron density [a.u.] in bonds critical points for [H<sub>2</sub>N-PDA][X-CY<sub>3</sub>] and [H<sub>2</sub>N-Pyr][X-CY<sub>3</sub>] complexes.

| DIMER                                      | BCP           | d [Å]  | $\rho_{\text{BCP}}$ | $\nabla^2\rho_{\text{BCP}}$ | $V_{\text{BCP}}$ | $G_{\text{BCP}}$ | $H_{\text{BCP}}$ |
|--------------------------------------------|---------------|--------|---------------------|-----------------------------|------------------|------------------|------------------|
| <b>H<sub>2</sub>N-PDA-ClCF<sub>3</sub></b> | <i>N...Cl</i> | 3.009  | 1.25E-02            | 4.32E-02                    | -7.90E-03        | 9.34E-03         | 1.45E-03         |
|                                            | <i>H...Cl</i> | 3.098* | -                   | -                           | -                | -                | -                |
|                                            | <i>H...Cl</i> | 3.101* | -                   | -                           | -                | -                | -                |
| <b>H<sub>2</sub>N-PDA-ClCH<sub>3</sub></b> | <i>N...Cl</i> | 3.219  | 8.69E-03            | 2.99E-02                    | -5.16E-03        | 6.31E-03         | 1.16E-03         |
|                                            | <i>H...Cl</i> | 3.176* | -                   | -                           | -                | -                | -                |
|                                            | <i>H...Cl</i> | 2.951  | 4.68E-03            | 1.64E-02                    | -2.28E-03        | 3.19E-03         | 9.03E-04         |
| <b>H<sub>2</sub>N-PDA-BrCF<sub>3</sub></b> | <i>N...Br</i> | 2.958  | 1.67E-02            | 5.06E-02                    | -1.01E-02        | 1.14E-02         | 1.27E-03         |
|                                            | <i>H...Br</i> | 2.931  | 6.02E-03            | 2.07E-02                    | -3.08E-03        | 4.13E-03         | 1.05E-03         |
|                                            | <i>H...Br</i> | 2.929  | 6.05E-03            | 2.08E-02                    | -3.09E-03        | 4.15E-03         | 1.06E-03         |
| <b>H<sub>2</sub>N-PDA-BrCH<sub>3</sub></b> | <i>N...Br</i> | 3.162  | 1.13E-02            | 3.55E-02                    | -6.59E-03        | 7.73E-03         | 1.14E-03         |
|                                            | <i>H...Br</i> | 3.047  | 4.88E-03            | 1.62E-02                    | -2.37E-03        | 3.21E-03         | 8.44E-04         |
|                                            | <i>H...Br</i> | 3.047  | 4.88E-03            | 1.62E-02                    | -2.37E-03        | 3.21E-03         | 8.44E-04         |
| <b>H<sub>2</sub>N-Pyr-ClCF<sub>3</sub></b> | <i>N...Cl</i> | 2.951  | 1.41E-02            | 4.96E-02                    | -9.14E-03        | 1.08E-02         | 1.63E-03         |
| <b>H<sub>2</sub>N-Pyr-ClCH<sub>3</sub></b> | <i>N...Cl</i> | 3.445* | 4.97E-03            | 1.85E-02                    | -2.81E-03        | 3.72E-03         | 9.11E-04         |
|                                            | <i>H...Cl</i> | 3.038* | 4.80E-03            | 1.71E-02                    | -2.45E-03        | 3.37E-03         | 9.17E-04         |
| <b>H<sub>2</sub>N-Pyr-BrCF<sub>3</sub></b> | <i>N...Br</i> | 2.881  | 1.89E-02            | 5.92E-02                    | -1.19E-02        | 1.34E-02         | 1.45E-03         |
| <b>H<sub>2</sub>N-Pyr-BrCH<sub>3</sub></b> | <i>N...Br</i> | 3.134  | 1.15E-02            | 3.73E-02                    | -6.80E-03        | 8.06E-03         | 1.26E-03         |

\* the length of interatomic contacts larger than the sum of van der Waals radii of interacting atoms



**Table S8.** Fluctuations of the electron density values at the critical points of halogen and hydrogen bonds in complexes of the [R-PDA][X-CY<sub>3</sub>] in relation to [PDA][X-CY<sub>3</sub>].

| R               | $\Delta\rho_{N\cdots X}$ (halogen bonds)  |                   |                   |                   |
|-----------------|-------------------------------------------|-------------------|-------------------|-------------------|
|                 | ClCF <sub>3</sub>                         | ClCH <sub>3</sub> | BrCF <sub>3</sub> | BrCH <sub>3</sub> |
| NH <sub>2</sub> | 0.00063 (+5.3%)                           | 0.00002 (+0.2%)   | 0.00087 (+5.5%)   | 0.00018 (+1,6%)   |
| OH              | 0.00021 (+1.8%)                           | 0.00005 (+0.6%)   | 0.00025 (+1.6%)   | 0.00008 (+0,7%)   |
| NO              | -0.00054 (-4.5%)                          | -0.00004 (-0.5%)  | -0.00114 (-7.2%)  | -0.00021 (-1,8%)  |
| NO <sub>2</sub> | -0.00069 (-5.8%)                          | 0.00006 (+0.7%)   | -0.00142 (-8.9%)  | -0.00023 (-2,0%)  |
| R               | $\Delta\rho_{H\cdots X}$ (hydrogen bonds) |                   |                   |                   |
|                 | ClCF <sub>3</sub>                         | ClCH <sub>3</sub> | BrCF <sub>3</sub> | BrCH <sub>3</sub> |
| NH <sub>2</sub> | -                                         | -                 | 0.00010 (+1.7%)   | -0.00006 (-1.2%)  |
|                 | -                                         | 0.00094 (+25.1%)  | 0.00014 (+2.4%)   | -0.00006 (-1.2%)  |
| OH              | -                                         | 0.00005 (+1.4%)   | 0.00006 (+0.9%)   | -0.00003 (-0.5%)  |
|                 | -                                         | -                 | -0.00004 (-0.8%)  | -0.00010 (-2.0%)  |
| NO              | -                                         | 0.00065 (+11.0%)  | -0.00018 (-3.1%)  | 0.00011 (+2.2%)   |
|                 | -                                         | -                 | -0.00042 (-7.0%)  | -0.00017 (-3.5%)  |
| NO <sub>2</sub> | -                                         | -0.00003 (-0.6%)  | -0.00060 (-10.2%) | -0.00013 (-2.7%)  |
|                 | -                                         | -0.00002 (-0.5%)  | -0.00057 (-9.7%)  | -0.00014 (-2.9%)  |

**Table S9.** Fluctuations of the electron density values at the critical points of halogen and hydrogen bonds in complexes of the [R-Pyr][X-CY<sub>3</sub>] in relation to [Pyr][X-CY<sub>3</sub>].

| R               | $\Delta\rho_{N\cdots X}$ (halogen bonds)  |                   |                   |                   |
|-----------------|-------------------------------------------|-------------------|-------------------|-------------------|
|                 | ClCF <sub>3</sub>                         | ClCH <sub>3</sub> | BrCF <sub>3</sub> | BrCH <sub>3</sub> |
| NH <sub>2</sub> | 0.00091 (+6.9%)                           | -0.00046 (-8.5%)  | 0.00121 (+6.9%)   | 0.00029 (+2.6%)   |
| OH              | 0.00025 (+1.9%)                           | -0.00025 (-4.6%)  | 0.00031 (+1.7%)   | -0.00005 (-0.4%)  |
| NO              | -0.00121 (-9.2%)                          | -0.00119 (-21.9%) | -0.00165 (-9.3%)  | -0.00071 (-6.3%)  |
| NO <sub>2</sub> | -0.00157 (-11.9%)                         | -0.00067 (-12.3%) | -0.00207 (-11.7%) | 0.00678 (+60.3%)  |
| R               | $\Delta\rho_{H\cdots X}$ (hydrogen bonds) |                   |                   |                   |
|                 | ClCF <sub>3</sub>                         | ClCH <sub>3</sub> | BrCF <sub>3</sub> | BrCH <sub>3</sub> |
| NH <sub>2</sub> | -                                         | -0.00006 (-1.2%)  | -                 | -                 |
| OH              | -                                         | 0.00003 (+0.5%)   | -                 | -                 |
| NO              | -                                         | 0.00065 (+13.3%)  | -                 | -                 |
| NO <sub>2</sub> | -                                         | 0.00009 (+1.8%)   | -                 | -                 |

**Table S10.** Fluctuations of the total interaction energy values of the [R-PDA][X-CY<sub>3</sub>] and [R-Pyr][X-CY<sub>3</sub>] complexes in relation to [PDA][X-CY<sub>3</sub>] and [Pyr][X-CY<sub>3</sub>].

| R                                          | $\Delta E_{\text{tot}}$ |                   |                   |                   |
|--------------------------------------------|-------------------------|-------------------|-------------------|-------------------|
|                                            | ClCF <sub>3</sub>       | ClCH <sub>3</sub> | BrCF <sub>3</sub> | BrCH <sub>3</sub> |
| <i>[R-PDA][X-CY<sub>3</sub>] complexes</i> |                         |                   |                   |                   |
| <b>NH<sub>2</sub></b>                      | -0.131 (+5.0%)          | 0.148 (-9.7%)     | -0.215 (+4.8%)    | 0.188 (-6.5%)     |
| <b>OH</b>                                  | -0.106 (+4.0%)          | 0.005 (-0.3%)     | -0.091 (+2.0%)    | -0.023 (+0.8%)    |
| <b>NO</b>                                  | 0.282 (-10.7%)          | -0.348 (+22.8%)   | 0.513 (-11.4%)    | -0.204 (+7.1%)    |
| <b>NO<sub>2</sub></b>                      | 0.327 (-12.4%)          | -0.555 (+36.3%)   | 0.648 (-14.4%)    | -0.275 (+9.5%)    |
| <i>[R-Pyr][X-CY<sub>3</sub>] complexes</i> |                         |                   |                   |                   |
| <b>NH<sub>2</sub></b>                      | -0.336 (+12.7%)         | 0.137 (-9.0%)     | -0.584 (+12.5%)   | -0.022 (+1.4%)    |
| <b>OH</b>                                  | -0.083 (+3.1%)          | -0.002 (+0.2%)    | -0.141 (+3.0%)    | -0.035 (+2.2%)    |
| <b>NO</b>                                  | 0.460 (-17.3%)          | -0.383 (+25.1%)   | 0.780 (-16.7%)    | -0.095 (+6.0%)    |
| <b>NO<sub>2</sub></b>                      | 0.582 (-21.9%)          | -0.495 (+32.4%)   | 1.002 (-21.4%)    | -0.116 (+7.4%)    |

\* the percentage increase or decrease of the total interaction energy was calculated relative to the [PDA][X-CY<sub>3</sub>] and [Pyr][X-CY<sub>3</sub>] systems

**Table S11.** Cartesian coordinates of calculated geometries of the studied complexes.  
Geometries optimized at  $\omega$ B97X-D/6-311++G(d,p) level of theory.

|                       |  |                        |             |             |             |
|-----------------------|--|------------------------|-------------|-------------|-------------|
| PDA⋯ClCF <sub>3</sub> |  | Cartesian coordinates: |             |             |             |
| E=-1156.85391606 a.u. |  | C                      | -3.59555300 | -1.20385700 | 0.17045500  |
|                       |  | C                      | -4.26992900 | -0.00198300 | 0.30572400  |
|                       |  | C                      | -3.59776400 | 1.20114600  | 0.17085500  |
|                       |  | C                      | -2.22425900 | 1.14826600  | -0.09737600 |
|                       |  | C                      | -2.22215700 | -1.14839000 | -0.09768200 |
|                       |  | H                      | -4.10495800 | -2.15525200 | 0.25818600  |
|                       |  | H                      | -4.10888100 | 2.15160200  | 0.25882600  |
|                       |  | N                      | -1.55284900 | 0.00056200  | -0.21814600 |
|                       |  | N                      | -1.49344000 | 2.30017100  | -0.29029200 |
|                       |  | H                      | -1.85491700 | 3.15033200  | 0.10702200  |
|                       |  | H                      | -0.49328700 | 2.19318800  | -0.24297800 |
|                       |  | N                      | -1.48914600 | -2.29894300 | -0.29082500 |
|                       |  | H                      | -1.84905600 | -3.14964400 | 0.10679300  |
|                       |  | H                      | -0.48923700 | -2.18979700 | -0.24256100 |
|                       |  | Cl                     | 1.50127100  | 0.00142300  | -0.09162600 |
|                       |  | C                      | 3.25531400  | -0.00027300 | 0.07518600  |
|                       |  | F                      | 3.80411800  | -0.84738700 | -0.78611200 |
|                       |  | F                      | 3.60581100  | -0.36465400 | 1.30273100  |
|                       |  | F                      | 3.74423700  | 1.21164100  | -0.15766800 |
|                       |  | H                      | -5.33462900 | -0.00300900 | 0.51365000  |
|                       |  |                        |             |             |             |
| PDA⋯ClCH <sub>3</sub> |  | Cartesian coordinates: |             |             |             |
| E=-859.11758738 a.u.  |  | C                      | 2.54727900  | 1.20339300  | 0.24072000  |
|                       |  | C                      | 3.20519700  | -0.00007500 | 0.43605200  |
|                       |  | C                      | 2.54718800  | -1.20349200 | 0.24071000  |
|                       |  | C                      | 1.20376200  | -1.14742800 | -0.15263200 |
|                       |  | C                      | 1.20384800  | 1.14743200  | -0.15262200 |
|                       |  | H                      | 3.04763800  | 2.15411500  | 0.37655900  |
|                       |  | H                      | 3.04747800  | -2.15425200 | 0.37654000  |
|                       |  | N                      | 0.55183500  | 0.00002800  | -0.33839000 |
|                       |  | N                      | 0.47992400  | -2.29367900 | -0.40782800 |
|                       |  | H                      | 0.78340700  | -3.13810400 | 0.04705900  |
|                       |  | H                      | -0.51881900 | -2.15692000 | -0.43689900 |
|                       |  | N                      | 0.48009800  | 2.29374100  | -0.40780600 |
|                       |  | H                      | 0.78365100  | 3.13814100  | 0.04707900  |
|                       |  | H                      | -0.51865600 | 2.15706100  | -0.43687600 |
|                       |  | Cl                     | -2.64507200 | 0.00000500  | 0.03191500  |
|                       |  | C                      | -4.41163100 | 0.00003900  | 0.33074900  |
|                       |  | H                      | -4.83968700 | 0.89202700  | -0.12093900 |
|                       |  | H                      | -4.58250300 | 0.00031500  | 1.40486400  |
|                       |  | H                      | -4.83964800 | -0.89219800 | -0.12048300 |
|                       |  | H                      | 4.24649900  | -0.00011600 | 0.74085200  |
|                       |  |                        |             |             |             |
| PDA⋯BrCF <sub>3</sub> |  | Cartesian coordinates: |             |             |             |
| E=-3270.81908198 a.u. |  | C                      | 3.83460600  | 1.20213000  | 0.13294000  |
|                       |  | C                      | 4.51392200  | 0.00009400  | 0.23344800  |
|                       |  | C                      | 3.83470200  | -1.20199300 | 0.13291900  |
|                       |  | C                      | 2.44932500  | -1.14981400 | -0.06416200 |
|                       |  | C                      | 2.44923200  | 1.14984800  | -0.06415800 |
|                       |  | H                      | 4.34838700  | 2.15312300  | 0.19492000  |
|                       |  | H                      | 4.34855100  | -2.15295000 | 0.19488400  |
|                       |  | N                      | 1.77276400  | -0.00001300 | -0.14987000 |
|                       |  | N                      | 1.71469000  | -2.30324500 | -0.21874100 |
|                       |  | H                      | 2.10533400  | -3.15493700 | 0.14583400  |
|                       |  | H                      | 0.71653800  | -2.21086100 | -0.12422800 |
|                       |  | N                      | 1.71452500  | 2.30322800  | -0.21871400 |
|                       |  | H                      | 2.10532000  | 3.15502600  | 0.14544100  |
|                       |  | H                      | 0.71638300  | 2.21098900  | -0.12406700 |
|                       |  | Br                     | -1.21528400 | -0.00028900 | -0.06712200 |
|                       |  | C                      | -3.14066200 | 0.00009300  | 0.07499600  |
|                       |  | F                      | -3.64359900 | 1.14740000  | -0.37009300 |
|                       |  | F                      | -3.51981900 | -0.15643200 | 1.33987800  |
|                       |  | F                      | -3.66477700 | -0.99011800 | -0.64047500 |
|                       |  | H                      | 5.58758800  | 0.00013900  | 0.38808600  |

PDA $\cdots$ BrCH<sub>3</sub>

E=-2973.086657 a.u.

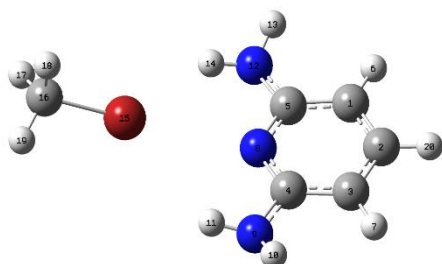

Graphical representation.

Cartesian coordinates:

|    |             |             |             |
|----|-------------|-------------|-------------|
| C  | -3.02400100 | -1.20303400 | 0.21234600  |
| C  | -3.68809200 | 0.00009800  | 0.38547000  |
| C  | -3.02390300 | 1.20317400  | 0.21232700  |
| C  | -1.66750300 | 1.14835400  | -0.13361000 |
| C  | -1.66759700 | -1.14832700 | -0.13359200 |
| H  | -3.52885800 | -2.15381000 | 0.32947600  |
| H  | -3.52868500 | 2.15399100  | 0.32944500  |
| N  | -1.00791300 | -0.00001500 | -0.29347000 |
| N  | -0.94108900 | 2.29621900  | -0.36654000 |
| H  | -1.26772000 | 3.14327100  | 0.06644800  |
| H  | 0.05955400  | 2.17213500  | -0.36998500 |
| N  | -0.94127500 | -2.29625500 | -0.36650600 |
| H  | -1.26796100 | -3.14326900 | 0.06651500  |
| H  | 0.05937600  | -2.17224800 | -0.36996400 |
| Br | 2.14862900  | -0.00008800 | 0.01409400  |
| C  | 4.07279300  | 0.00016700  | 0.28749900  |
| H  | 4.48357700  | -0.89306800 | -0.17599900 |
| H  | 4.26654400  | 0.00047900  | 1.35704400  |
| H  | 4.48340200  | 0.89323400  | -0.17648300 |
| H  | -4.73948700 | 0.00014300  | 0.65317100  |

O<sub>2</sub>N-PDA $\cdots$ ClCF<sub>3</sub>

E=-1361.34817279 a.u.

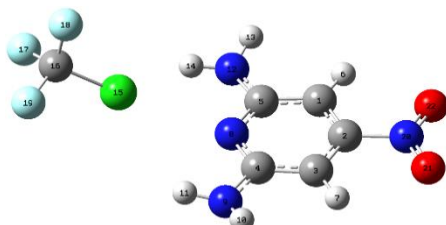

Graphical representation.

Cartesian coordinates:

|    |             |             |             |
|----|-------------|-------------|-------------|
| C  | -2.51168200 | -1.21235400 | -0.12305300 |
| C  | -3.13699600 | 0.00016200  | 0.07048400  |
| C  | -2.51106400 | 1.21229700  | -0.12336100 |
| C  | -1.16962400 | 1.15031300  | -0.52957000 |
| C  | -1.17021400 | -1.15114500 | -0.52926500 |
| H  | -3.03364600 | -2.14611600 | 0.02477400  |
| H  | -3.03259700 | 2.14636100  | 0.02409200  |
| N  | -0.51959800 | -0.00061100 | -0.71395400 |
| N  | -0.46509400 | 2.29455700  | -0.79091900 |
| H  | -0.79947500 | 3.16427000  | -0.41467200 |
| H  | 0.53177400  | 2.19796200  | -0.88852800 |
| N  | -0.46621500 | -2.29581800 | -0.79037200 |
| H  | -0.80093200 | -3.16515000 | -0.41352100 |
| H  | 0.53076700  | -2.19953100 | -0.88732900 |
| Cl | 2.49691000  | -0.00144100 | -0.12683100 |
| C  | 4.20213600  | 0.00020400  | 0.32623700  |
| F  | 4.85064500  | -0.96295400 | -0.31421000 |
| F  | 4.33419400  | -0.19737000 | 1.63044900  |
| F  | 4.75941400  | 1.16326600  | 0.01694400  |
| N  | -4.55782300 | 0.00060100  | 0.50446000  |
| O  | -5.09337200 | 1.07690500  | 0.66802400  |
| O  | -5.09361000 | -1.07537500 | 0.66939100  |

O<sub>2</sub>N-PDA $\cdots$ ClCH<sub>3</sub>

E=-1063.61313144 a.u.

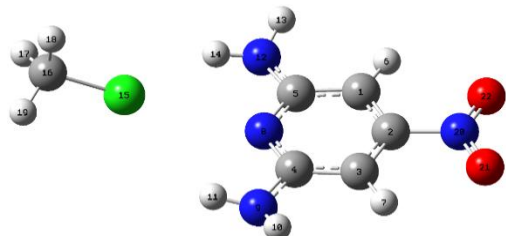

Graphical representation.

Cartesian coordinates:

|    |             |             |             |
|----|-------------|-------------|-------------|
| C  | -1.50879500 | -1.21310100 | -0.09235600 |
| C  | -2.15296100 | -0.00006100 | 0.02587400  |
| C  | -1.50901300 | 1.21312900  | -0.09201800 |
| C  | -0.12875800 | 1.15003000  | -0.33819800 |
| C  | -0.12855700 | -1.14968900 | -0.33855500 |
| H  | -2.04391600 | -2.14689300 | -0.00328000 |
| H  | -2.04431300 | 2.14680300  | -0.00278800 |
| N  | 0.53450200  | 0.00024700  | -0.45171500 |
| N  | 0.61187800  | 2.29071700  | -0.50838500 |
| H  | 0.24776200  | 3.15427200  | -0.14489700 |
| H  | 1.61119500  | 2.16952800  | -0.45978600 |
| N  | 0.61226800  | -2.29019200 | -0.50911800 |
| H  | 0.24825400  | -3.15394600 | -0.14600400 |
| H  | 1.61156700  | -2.16887500 | -0.46047800 |
| Cl | 3.68747000  | 0.00018800  | 0.15846100  |
| C  | 5.43121500  | -0.00047900 | 0.57493400  |
| H  | 5.88662100  | -0.89176000 | 0.14982100  |
| H  | 5.52976200  | -0.00297100 | 1.65792100  |
| H  | 5.88634400  | 0.89287500  | 0.15389800  |
| N  | -3.61367300 | -0.00023800 | 0.29427200  |
| O  | -4.16615700 | 1.07555000  | 0.39593700  |
| O  | -4.16557800 | -1.07616700 | 0.39759800  |

---

**O<sub>2</sub>N-PDA···BrCF<sub>3</sub>**

E=-3475.3128431 a.u.

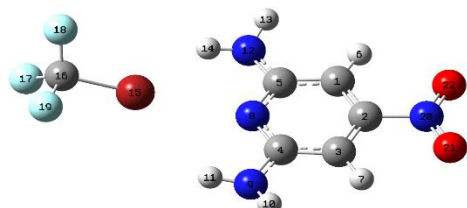

Graphical representation.

**Cartesian coordinates:**

|    |             |             |             |
|----|-------------|-------------|-------------|
| C  | -2.87759600 | -1.21181800 | -0.08190800 |
| C  | -3.51775200 | 0.00023000  | 0.05479300  |
| C  | -2.87709400 | 1.21197400  | -0.08213700 |
| C  | -1.50404900 | 1.15175900  | -0.36369100 |
| C  | -1.50447300 | -1.15221000 | -0.36318400 |
| H  | -3.41061900 | -2.14570900 | 0.01770000  |
| H  | -3.40974700 | 2.14610200  | 0.01722700  |
| N  | -0.83839300 | -0.00037400 | -0.48445400 |
| N  | -0.78489200 | 2.29821200  | -0.56096300 |
| H  | -1.16190900 | 3.16861000  | -0.22961000 |
| H  | 0.21783700  | 2.21597900  | -0.57559200 |
| N  | -0.78561100 | -2.29900700 | -0.55972000 |
| H  | -1.16315900 | -3.16906500 | -0.22806900 |
| H  | 0.21718100  | -2.21695100 | -0.57299900 |
| Br | 2.16506700  | -0.00161400 | -0.08473000 |
| C  | 4.06710000  | 0.00051000  | 0.25464800  |
| F  | 4.72088000  | -0.57400400 | -0.74775500 |
| F  | 4.34273600  | -0.66514500 | 1.37001900  |
| F  | 4.51297200  | 1.24442800  | 0.38813000  |
| N  | -4.97170000 | 0.00058300  | 0.36118800  |
| O  | -5.51892400 | 1.07696400  | 0.47805400  |
| O  | -5.51968300 | -1.07553000 | 0.47692700  |

---

**O<sub>2</sub>N-PDA···BrCH<sub>3</sub>**

E=-3177.58190197 a.u.

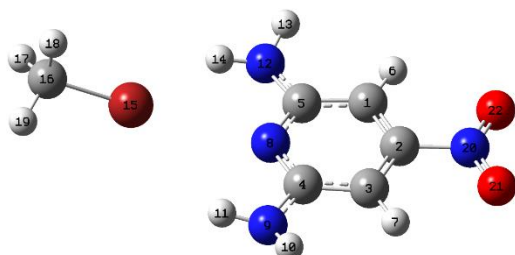

Graphical representation.

**Cartesian coordinates:**

|    |             |             |             |
|----|-------------|-------------|-------------|
| C  | 2.05028300  | 1.21278900  | -0.08937300 |
| C  | 2.69483200  | -0.00009300 | 0.02467300  |
| C  | 2.04988800  | -1.21274800 | -0.08954400 |
| C  | 0.66785700  | -1.15040300 | -0.32555900 |
| C  | 0.66823000  | 1.15092300  | -0.32539000 |
| H  | 2.58627700  | 2.14650700  | -0.00509100 |
| H  | 2.58559100  | -2.14664600 | -0.00538700 |
| N  | 0.00275800  | 0.00037700  | -0.43136400 |
| N  | -0.06906800 | -2.29265700 | -0.49309400 |
| H  | 0.30343200  | -3.15755500 | -0.14188000 |
| H  | -1.06967000 | -2.18251300 | -0.44679700 |
| N  | -0.06833200 | 2.29343600  | -0.49274200 |
| H  | 0.30444900  | 3.15818200  | -0.14145800 |
| H  | -1.06896700 | 2.18360400  | -0.44651000 |
| Br | -3.13320500 | 0.00006200  | 0.08878300  |
| C  | -5.03221100 | -0.00051900 | 0.50379500  |
| H  | -5.47428500 | 0.89279900  | 0.07061600  |
| H  | -5.14593800 | -0.00066700 | 1.58462100  |
| H  | -5.47378000 | -0.89396900 | 0.07043900  |
| N  | 4.15751500  | -0.00035300 | 0.28281600  |
| O  | 4.70991900  | -1.07637000 | 0.38141000  |
| O  | 4.71029100  | 1.07546700  | 0.38148200  |

---

**ON-PDA···ClCF<sub>3</sub>**

E=-1286.13415678 a.u.

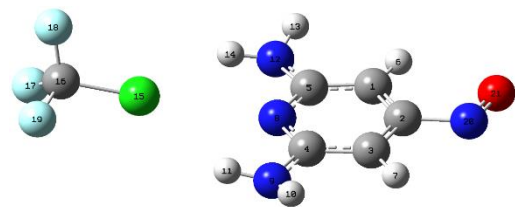

Graphical representation.

**Cartesian coordinates:**

|    |             |             |             |
|----|-------------|-------------|-------------|
| C  | 0.00000000  | 0.00000000  | 0.00000000  |
| C  | 0.00000000  | 0.00000000  | 1.38472402  |
| C  | 1.16853050  | 0.00000000  | 2.12033719  |
| C  | 2.37188792  | -0.00794940 | 1.39545075  |
| C  | 1.25266658  | -0.00764726 | -0.62042445 |
| H  | -0.92614319 | 0.01203291  | -0.55880982 |
| H  | 1.13925517  | 0.01147751  | 3.20241220  |
| N  | 2.40446674  | -0.02127514 | 0.06372802  |
| N  | 3.58153713  | 0.03225721  | 2.03922080  |
| H  | 3.61824210  | -0.24239670 | 3.00525829  |
| H  | 4.39385586  | -0.17885311 | 1.48373148  |
| N  | 1.36751415  | 0.03339281  | -1.98710953 |
| H  | 0.57504339  | -0.24573086 | -2.53884423 |
| H  | 2.27296703  | -0.19018986 | -2.36552501 |
| Cl | 5.05035270  | -0.66210739 | -1.37326896 |
| C  | 6.55601810  | -1.11007677 | -2.17575867 |
| F  | 6.75167338  | -0.35490204 | -3.24776700 |
| F  | 6.51802175  | -2.38027853 | -2.55609884 |
| F  | 7.58281700  | -0.94778150 | -1.35160909 |
| N  | -1.21894184 | 0.00366535  | 2.18218851  |
| O  | -2.23480727 | 0.00210544  | 1.54516681  |

---

E=-988.39885635 a.u.

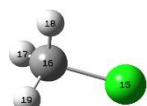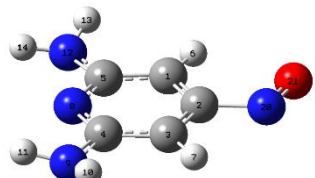

Graphical representation.

Cartesian coordinates:

| Cartesian coordinates |             |             |
|-----------------------|-------------|-------------|
| C                     | -1.93990600 | -1.04795400 |
| C                     | -2.50549800 | 0.20927200  |
| C                     | -1.76036000 | 1.36823300  |
| C                     | -0.38596700 | 1.21415500  |
| C                     | -0.56407700 | -1.08317800 |
| H                     | -2.54262900 | -1.94304000 |
| H                     | -2.23200000 | 2.33718700  |
| N                     | 0.18535700  | 0.02018400  |
| N                     | 0.43754600  | 2.30079300  |
| H                     | 0.14006900  | 3.17916600  |
| H                     | 1.42518000  | 2.10435300  |
| N                     | 0.10138100  | -2.26938600 |
| H                     | -0.31573800 | -3.10800300 |
| H                     | 1.10586000  | -2.21212300 |
| Cl                    | 3.36421100  | -0.10534100 |
| C                     | 5.12089500  | -0.13151700 |
| H                     | 5.54430800  | -1.04092800 |
| H                     | 5.25729800  | -0.11168100 |
| H                     | 5.57868000  | 0.74286300  |
| N                     | -3.92041900 | 0.42230700  |
| O                     | -4.57127400 | -0.58104300 |

E=-3400.09896949 a.u.

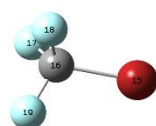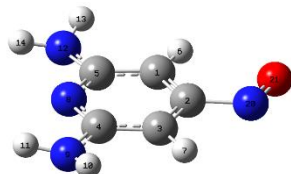

Graphical representation.

Cartesian coordinates:

|    |             |             |             |
|----|-------------|-------------|-------------|
| C  | -3.26302200 | -1.06297000 | -0.01807900 |
| C  | -3.88101900 | 0.17165100  | 0.08172200  |
| C  | -3.17400900 | 1.35536900  | 0.01594600  |
| C  | -1.78271500 | 1.25404600  | -0.14978300 |
| C  | -1.87484100 | -1.05226800 | -0.18195700 |
| H  | -3.83581500 | -1.97964600 | 0.02374600  |
| H  | -3.68422400 | 2.30755600  | 0.08540200  |
| N  | -1.15682700 | 0.07937500  | -0.23499400 |
| N  | -1.00824000 | 2.37759700  | -0.26513700 |
| H  | -1.38203100 | 3.25221600  | 0.05895700  |
| H  | -0.01219100 | 2.25880900  | -0.18319700 |
| N  | -1.17383500 | -2.22046600 | -0.33279000 |
| N  | -1.60468900 | -3.07644700 | -0.03001600 |
| H  | -0.17350700 | -2.16763500 | -0.23643700 |
| Br | 1.86310900  | -0.01417700 | -0.06710800 |
| C  | 3.78408100  | -0.06536600 | 0.13026400  |
| F  | 4.24427500  | -1.28761600 | -0.11212900 |
| F  | 4.13618000  | 0.27641600  | 1.36483100  |
| F  | 4.36383600  | 0.77649400  | -0.71742400 |
| N  | -5.31852600 | 0.33175400  | 0.25964200  |
| O  | -5.93297700 | -0.69585900 | 0.31963900  |

E=-3102.36768128 a.u.

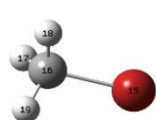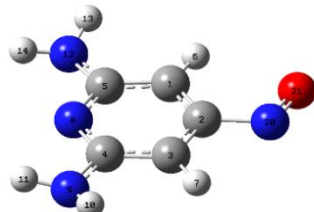

Graphical representation.

Cartesian coordinates:

|    |             |             |             |
|----|-------------|-------------|-------------|
| C  | -2.43649500 | -1.05463200 | -0.04333400 |
| C  | -3.03655300 | 0.18640100  | 0.09251400  |
| C  | -2.32098800 | 1.36454500  | 0.00242600  |
| C  | -0.93953800 | 1.24847700  | -0.22736100 |
| C  | -1.05672200 | -1.05416300 | -0.27044800 |
| H  | -3.01634500 | -1.96565700 | 0.01933100  |
| H  | -2.81860500 | 2.32080100  | 0.10189800  |
| N  | -0.33390800 | 0.06964200  | -0.35074100 |
| N  | -0.14808500 | 2.35917100  | -0.36994200 |
| H  | -0.47993800 | 3.23003700  | 0.00656700  |
| H  | 0.84597000  | 2.20063700  | -0.31940800 |
| N  | -0.36319300 | -2.22319800 | -0.45947400 |
| H  | -0.76998200 | -3.07489700 | -0.11357100 |
| H  | 0.64002100  | -2.15183800 | -0.39566600 |
| Br | 2.81675900  | -0.06223300 | 0.06290700  |
| C  | 4.73055000  | -0.13079500 | 0.39562300  |
| H  | 5.12892900  | -1.01609900 | -0.09297700 |
| H  | 4.88920400  | -0.18107100 | 1.46960100  |
| H  | 5.17948900  | 0.76831600  | -0.01811300 |
| N  | -4.46069400 | 0.36098500  | 0.33646100  |
| O  | -5.08571000 | -0.65965700 | 0.41874200  |

---

**HO-PDA $\cdots$ ClCF<sub>3</sub>**

E=-1232.08298123 a.u.

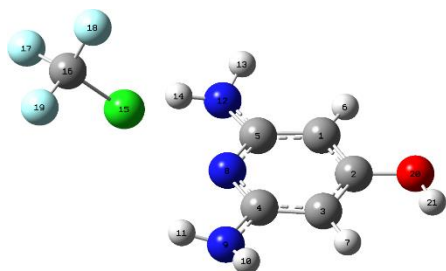

Graphical representation.

**Cartesian coordinates:**

|    |             |             |             |
|----|-------------|-------------|-------------|
| C  | -3.02920400 | -1.21445100 | 0.18491000  |
| C  | -3.64141600 | -0.01016200 | 0.49762200  |
| C  | -3.03241900 | 1.19651400  | 0.17055300  |
| C  | -1.79161800 | 1.13590600  | -0.47021700 |
| C  | -1.79157200 | -1.15464800 | -0.45752600 |
| H  | -3.51120100 | -2.15385000 | 0.41996300  |
| H  | -3.50544400 | 2.14859900  | 0.38398100  |
| N  | -1.17438600 | -0.00887700 | -0.76800100 |
| N  | -1.14744900 | 2.28724000  | -0.86711300 |
| H  | -1.36230800 | 3.13608000  | -0.37238100 |
| H  | -0.17944900 | 2.16894100  | -1.11898300 |
| N  | -1.14309200 | -2.30491200 | -0.84383300 |
| H  | -1.37235600 | -3.15639700 | -0.36067600 |
| H  | -0.17464100 | -2.19229300 | -1.09515600 |
| Cl | 1.79448500  | -0.00211400 | -0.17227500 |
| C  | 3.49507200  | 0.00544700  | 0.28476800  |
| F  | 4.15246800  | -0.95653000 | -0.35135900 |
| F  | 3.62768100  | -0.18968400 | 1.59076500  |
| F  | 4.05374200  | 1.16995300  | -0.02352400 |
| O  | -4.84198500 | -0.06478700 | 1.11874700  |
| H  | -5.16855000 | 0.82372200  | 1.27097700  |

---

**HO-PDA $\cdots$ ClCH<sub>3</sub>**

E=-934.34648808 a.u.

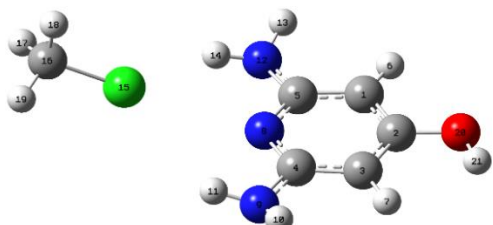

Graphical representation.

**Cartesian coordinates:**

|    |             |             |             |
|----|-------------|-------------|-------------|
| C  | 2.15314900  | 1.21550900  | 0.07734500  |
| C  | 2.82158800  | 0.01113700  | 0.23772200  |
| C  | 2.15223400  | -1.19623800 | 0.06890700  |
| C  | 0.79433700  | -1.13471300 | -0.26125700 |
| C  | 0.79763100  | 1.15347000  | -0.25421300 |
| H  | 2.67544600  | 2.15541200  | 0.19591300  |
| H  | 2.66057700  | -2.14839900 | 0.17448900  |
| N  | 0.12945100  | 0.00868500  | -0.41518600 |
| N  | 0.06456300  | -2.28378500 | -0.48445200 |
| H  | 0.38303100  | -3.12552000 | -0.03478400 |
| H  | -0.93429700 | -2.14434300 | -0.47211700 |
| N  | 0.06649900  | 2.30048500  | -0.47110300 |
| H  | 0.39677800  | 3.14752000  | -0.04093200 |
| H  | -0.93274800 | 2.16723100  | -0.45695000 |
| Cl | -3.04380800 | -0.00687000 | 0.09721600  |
| C  | -4.79999700 | -0.01124300 | 0.45206400  |
| H  | -5.24333200 | 0.88159300  | 0.01709600  |
| H  | -4.93761000 | -0.01506300 | 1.53096300  |
| H  | -5.24062500 | -0.90249700 | 0.01110800  |
| O  | 4.13663800  | 0.06502300  | 0.55830300  |
| H  | 4.48716900  | -0.82455000 | 0.62790400  |

---

**HO-PDA $\cdots$ BrCF<sub>3</sub>**

E=-3346.04812636 a.u.

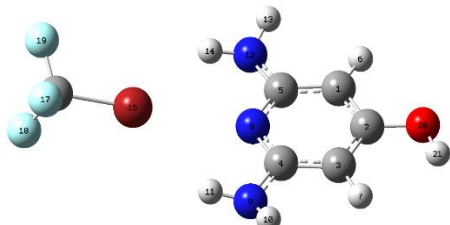

Graphical representation.

**Cartesian coordinates:**

|    |             |             |             |
|----|-------------|-------------|-------------|
| C  | -3.46917400 | 1.21371900  | -0.06470700 |
| C  | -4.15059200 | 0.01116700  | -0.17111200 |
| C  | -3.46964100 | -1.19574100 | -0.05948100 |
| C  | -2.08952100 | -1.13920500 | 0.15465300  |
| C  | -2.09150200 | 1.15417100  | 0.15062900  |
| H  | -3.99868600 | 2.15429400  | -0.13431200 |
| H  | -3.98521800 | -2.14766400 | -0.11937800 |
| N  | -1.40802000 | 0.00610100  | 0.24678000  |
| N  | -1.36219500 | -2.29557200 | 0.32135300  |
| H  | -1.74209400 | -3.14478500 | -0.05996800 |
| H  | -0.36250500 | -2.20019400 | 0.24746400  |
| N  | -1.36150900 | 2.30734100  | 0.31335600  |
| H  | -1.74929600 | 3.16142600  | -0.04818200 |
| H  | -0.36188400 | 2.21622500  | 0.23816700  |
| Br | 1.56520500  | 0.00187000  | 0.06763700  |
| C  | 3.48656500  | -0.00530700 | -0.12078200 |
| F  | 3.87489900  | -0.98429100 | -0.93310700 |
| F  | 4.07618600  | -0.18469800 | 1.05657600  |
| F  | 3.91233100  | 1.14817900  | -0.62747800 |
| O  | -5.48536600 | 0.06803300  | -0.37949500 |
| H  | -5.84503600 | -0.81963600 | -0.42467100 |

---



**HO-PDA $\cdots$ BrCH<sub>3</sub>**

E=-3048.31560167 a.u.

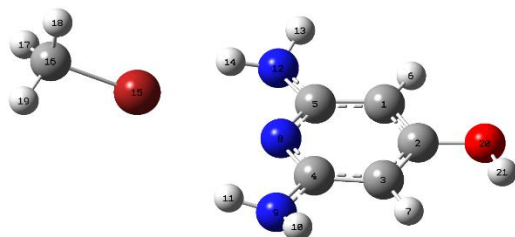

Graphical representation.

**Cartesian coordinates:**

|    |             |             |             |
|----|-------------|-------------|-------------|
| C  | 2.64760600  | 1.21667000  | 0.07380300  |
| C  | 3.31968300  | 0.01402700  | 0.23031900  |
| C  | 2.65143300  | -1.19447600 | 0.06701800  |
| C  | 1.29076700  | -1.13707500 | -0.25159600 |
| C  | 1.28956200  | 1.15298100  | -0.24612800 |
| H  | 3.16919000  | 2.15771300  | 0.18590800  |
| H  | 3.16265700  | -2.14560300 | 0.16724400  |
| N  | 0.62084000  | 0.00582000  | -0.39789200 |
| N  | 0.56702800  | -2.28932400 | -0.47087400 |
| H  | 0.89809400  | -3.13252600 | -0.03365700 |
| H  | -0.43353800 | -2.16428600 | -0.45801600 |
| N  | 0.55987400  | 2.30005200  | -0.46073600 |
| H  | 0.89875100  | 3.14987000  | -0.04331100 |
| H  | -0.44050700 | 2.17685500  | -0.44605800 |
| Br | -2.51283000 | -0.00387100 | 0.05368600  |
| C  | -4.42319900 | -0.00921000 | 0.41094200  |
| H  | -4.85550300 | 0.88410200  | -0.03242200 |
| H  | -4.57105200 | -0.01228500 | 1.48780000  |
| H  | -4.85177400 | -0.90203300 | -0.03702300 |
| O  | 4.63669200  | 0.07099400  | 0.54019400  |
| H  | 4.98987800  | -0.81759300 | 0.60931800  |

**H<sub>2</sub>N-PDA $\cdots$ ClCF<sub>3</sub>**

E=-1212.2185633 a.u.

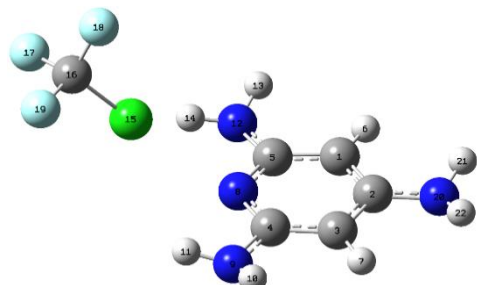

Graphical representation.

**Cartesian coordinates:**

|    |             |             |             |
|----|-------------|-------------|-------------|
| C  | -2.98711700 | -1.20092900 | 0.17510200  |
| C  | -3.60134600 | 0.00295400  | 0.52437600  |
| C  | -2.98319500 | 1.20390900  | 0.17203200  |
| C  | -1.76998600 | 1.14182300  | -0.51179400 |
| C  | -1.77376400 | -1.14450900 | -0.50894500 |
| H  | -3.45260200 | -2.15304600 | 0.40191600  |
| H  | -3.44565600 | 2.15809800  | 0.39631200  |
| N  | -1.16084700 | -0.00275800 | -0.83683400 |
| N  | -1.13565500 | 2.29339600  | -0.92921800 |
| H  | -1.33186100 | 3.13971600  | -0.42246200 |
| H  | -0.17491700 | 2.17187600  | -1.20618700 |
| N  | -1.14316400 | -2.29916600 | -0.92367500 |
| H  | -1.34197000 | -3.14351000 | -0.41462600 |
| H  | -0.18193100 | -2.18122000 | -1.20055500 |
| Cl | 1.77583000  | -0.00418200 | -0.17912300 |
| C  | 3.46574900  | 0.00061900  | 0.31195500  |
| F  | 4.13856600  | -0.95448000 | -0.31952600 |
| F  | 3.57340300  | -0.20731600 | 1.61897900  |
| F  | 4.03047300  | 1.16860300  | 0.02708300  |
| N  | -4.82702600 | 0.00580900  | 1.15992700  |
| H  | -5.09010000 | -0.83677100 | 1.64313900  |
| H  | -5.08726800 | 0.85050800  | 1.64097300  |

**H<sub>2</sub>N-PDA $\cdots$ ClCH<sub>3</sub>**

E=-914.48178911 a.u.

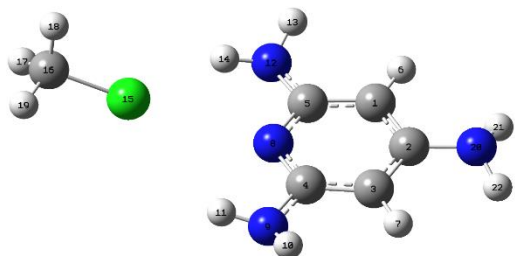

Graphical representation.

**Cartesian coordinates:**

|    |             |             |             |
|----|-------------|-------------|-------------|
| C  | -2.09404000 | -1.23524900 | 0.04982600  |
| C  | -2.83972900 | -0.06718800 | 0.21475800  |
| C  | -2.20383600 | 1.16718500  | 0.07610300  |
| C  | -0.84057600 | 1.17175200  | -0.22111300 |
| C  | -0.73663700 | -1.10968400 | -0.24704200 |
| H  | -2.55574500 | -2.21154900 | 0.14324900  |
| H  | -2.75095700 | 2.09602000  | 0.19025200  |
| N  | -0.11498700 | 0.06353500  | -0.37704800 |
| N  | -0.15792100 | 2.35773500  | -0.41095700 |
| H  | -0.52291200 | 3.17251400  | 0.05322000  |
| H  | 0.84513000  | 2.26055300  | -0.37154200 |
| N  | 0.04993400  | -2.22409700 | -0.46450100 |
| H  | -0.24110900 | -3.07912100 | -0.02090600 |
| H  | 1.04055400  | -2.03864900 | -0.41956000 |
| Cl | 3.06908800  | 0.04162300  | 0.09640200  |
| C  | 4.83156800  | -0.06182900 | 0.40035100  |
| H  | 5.26437200  | -0.76434600 | -0.30837000 |
| H  | 4.98989400  | -0.40606500 | 1.41990000  |
| H  | 5.26654000  | 0.92567100  | 0.26359800  |
| N  | -4.18104300 | -0.13214400 | 0.55227700  |
| H  | -4.65245400 | -0.99377400 | 0.33038200  |
| H  | -4.73019600 | 0.68603400  | 0.34525100  |



---

**H<sub>2</sub>N-PDA···BrCF<sub>3</sub>**

E=-3326.18389461 a.u.

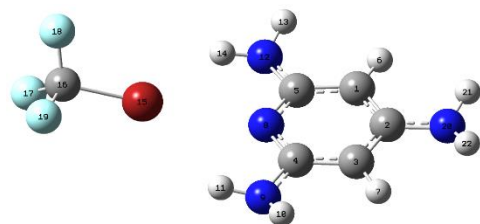

Graphical representation.

**Cartesian coordinates:**

|    |             |             |             |
|----|-------------|-------------|-------------|
| C  | -3.43750700 | -1.20164200 | 0.07019200  |
| C  | -4.13245300 | 0.00014800  | 0.21360000  |
| C  | -3.43741700 | 1.20187400  | 0.07042000  |
| C  | -2.07215500 | 1.14474800  | -0.20512700 |
| C  | -2.07222600 | -1.14462500 | -0.20513000 |
| H  | -3.94683300 | -2.15526900 | 0.14528400  |
| H  | -3.94666200 | 2.15554800  | 0.14544800  |
| N  | -1.38961100 | 0.00006100  | -0.32791700 |
| N  | -1.35110400 | 2.30178600  | -0.40565700 |
| H  | -1.71555300 | 3.14943400  | -0.00600300 |
| H  | -0.34957100 | 2.20567200  | -0.36655400 |
| N  | -1.35100600 | -2.30161800 | -0.40535900 |
| H  | -1.71596300 | -3.14935400 | -0.00636200 |
| H  | -0.34951800 | -2.20527000 | -0.36480500 |
| Br | 1.55851100  | -0.00114600 | -0.08083300 |
| C  | 3.47364400  | 0.00015900  | 0.15955800  |
| F  | 4.08171200  | -0.56743400 | -0.87776900 |
| F  | 3.81221400  | -0.67274200 | 1.25628700  |
| F  | 3.93125900  | 1.24376800  | 0.27921300  |
| N  | -5.49325400 | 0.00016800  | 0.44082500  |
| H  | -5.89350100 | -0.84418600 | 0.81398200  |
| H  | -5.89343100 | 0.84444200  | 0.81424400  |

---

**H<sub>2</sub>N-PDA···BrCH<sub>3</sub>**

E=-3028.45081047 a.u.

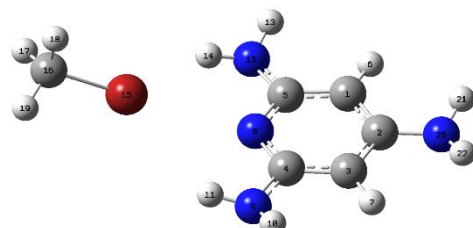

Graphical representation.

**Cartesian coordinates:**

|    |             |             |             |
|----|-------------|-------------|-------------|
| C  | 2.63374600  | 1.20243300  | 0.06112300  |
| C  | 3.32137900  | -0.00004800 | 0.23124900  |
| C  | 2.63368500  | -1.20249100 | 0.06110000  |
| C  | 1.27983800  | -1.14287000 | -0.27012700 |
| C  | 1.27989500  | 1.14288500  | -0.27010200 |
| H  | 3.13995000  | 2.15587800  | 0.15905900  |
| H  | 3.13984000  | -2.15596300 | 0.15902600  |
| N  | 0.60717200  | 0.00002700  | -0.42499700 |
| N  | 0.55472400  | -2.29528600 | -0.49506900 |
| H  | 0.88273800  | -3.13650500 | -0.05158100 |
| H  | -0.44546900 | -2.16787800 | -0.48111500 |
| N  | 0.55483900  | 2.29534300  | -0.49501800 |
| H  | 0.88287900  | 3.13652900  | -0.05148500 |
| H  | -0.44535900 | 2.16798000  | -0.48108700 |
| Br | -2.51632400 | 0.00007400  | 0.06374700  |
| C  | -4.42361300 | -0.00019200 | 0.43703900  |
| H  | -4.85829700 | 0.89277600  | -0.00481500 |
| H  | -4.56333500 | -0.00038300 | 1.51505900  |
| H  | -4.85810300 | -0.89312300 | -0.00510700 |
| N  | 4.67518400  | -0.00008500 | 0.51255500  |
| H  | 5.05176900  | 0.84273700  | 0.91347600  |
| H  | 5.05172800  | -0.84293500 | 0.91345700  |

---

**Pyr···ClCF<sub>3</sub>**

E=-1046.11281164 a.u.

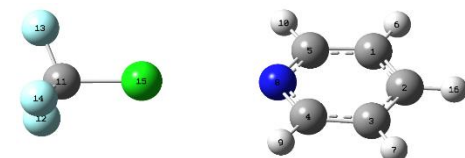

Graphical representation.

**Cartesian coordinates:**

|    |             |             |             |
|----|-------------|-------------|-------------|
| C  | 3.82297800  | -1.19484800 | 0.02035300  |
| C  | 4.53245700  | -0.00182100 | 0.04669000  |
| C  | 3.82591700  | 1.19293800  | 0.02052400  |
| C  | 2.43808700  | 1.14011400  | -0.03032700 |
| C  | 2.43529600  | -1.13861100 | -0.03045200 |
| H  | 4.32920900  | -2.15235600 | 0.03963500  |
| H  | 4.33445700  | 2.14922200  | 0.03994400  |
| N  | 1.74658200  | 0.00159700  | -0.05558700 |
| H  | 1.85260400  | 2.05503900  | -0.05128800 |
| H  | 1.84754700  | -2.05208400 | -0.05151400 |
| C  | -2.99330200 | -0.00017700 | 0.01255700  |
| F  | -3.43112500 | -0.14249200 | 1.25964100  |
| F  | -3.48288400 | -0.99940600 | -0.71501600 |
| F  | -3.47803600 | 1.14003600  | -0.46939200 |
| Cl | -1.23800500 | 0.00137500  | -0.03464000 |
| H  | 5.61600500  | -0.00317700 | 0.08802700  |

---

|                                                                                                                                 |                           |                        |             |             |             |
|---------------------------------------------------------------------------------------------------------------------------------|---------------------------|------------------------|-------------|-------------|-------------|
| Pyr···ClCH <sub>3</sub>                                                                                                         |                           | Cartesian coordinates: |             |             |             |
| <div>E=-748.37461895 a.u.</div> <div>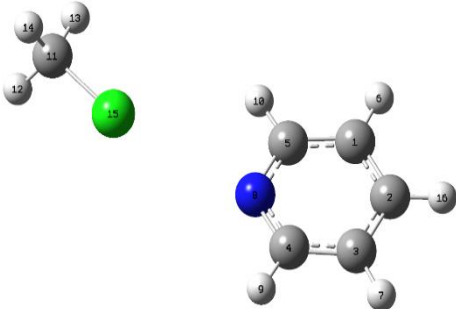</div>    | Graphical representation. | C                      | 2.10218000  | 1.39650600  | 0.00424700  |
|                                                                                                                                 |                           | C                      | 3.26024000  | 0.63106200  | -0.01375100 |
|                                                                                                                                 |                           | C                      | 3.14074000  | -0.75200300 | -0.01665300 |
|                                                                                                                                 |                           | C                      | 1.86574100  | -1.30633900 | -0.00114600 |
|                                                                                                                                 |                           | C                      | 0.87525900  | 0.74296000  | 0.01828100  |
|                                                                                                                                 |                           | H                      | 2.14361100  | 2.47929600  | 0.00732400  |
|                                                                                                                                 |                           | H                      | 4.01416200  | -1.39317600 | -0.03039100 |
|                                                                                                                                 |                           | N                      | 0.74732900  | -0.58317500 | 0.01602100  |
|                                                                                                                                 |                           | H                      | 1.73553800  | -2.38501000 | -0.00276400 |
|                                                                                                                                 |                           | H                      | -0.05318900 | 1.30728200  | 0.03224000  |
|                                                                                                                                 |                           | C                      | -4.32158600 | 0.33749700  | -0.02887300 |
|                                                                                                                                 |                           | H                      | -4.85203500 | -0.16195600 | -0.83650100 |
|                                                                                                                                 |                           | H                      | -4.29638200 | 1.41112200  | -0.20248600 |
|                                                                                                                                 |                           | H                      | -4.79633900 | 0.12150800  | 0.92559300  |
|                                                                                                                                 |                           | Cl                     | -2.64108300 | -0.27636900 | 0.01457600  |
|                                                                                                                                 |                           | H                      | 4.23630400  | 1.10333800  | -0.02559100 |
| Pyr···BrCF <sub>3</sub>                                                                                                         |                           | Cartesian coordinates: |             |             |             |
| <div>E= -3160.07829476 a.u.</div> <div></div>  | Graphical representation. | C                      | 4.03580300  | 1.19405000  | 0.00209600  |
|                                                                                                                                 |                           | C                      | 4.74321300  | -0.00053600 | 0.00402200  |
|                                                                                                                                 |                           | C                      | 4.03498300  | -1.19464000 | 0.00208300  |
|                                                                                                                                 |                           | C                      | 2.64674800  | -1.14074500 | -0.00156200 |
|                                                                                                                                 |                           | C                      | 2.64752700  | 1.14110000  | -0.00156100 |
|                                                                                                                                 |                           | H                      | 4.54421500  | 2.15047800  | 0.00353200  |
|                                                                                                                                 |                           | H                      | 4.54275400  | -2.15140700 | 0.00351300  |
|                                                                                                                                 |                           | N                      | 1.95881700  | 0.00041200  | -0.00348900 |
|                                                                                                                                 |                           | H                      | 2.05785700  | -2.05354100 | -0.00312900 |
|                                                                                                                                 |                           | H                      | 2.05926700  | 2.05430200  | -0.00312400 |
|                                                                                                                                 |                           | C                      | -2.88138500 | -0.00006300 | 0.00217700  |
|                                                                                                                                 |                           | F                      | -3.35855700 | 1.13680300  | -0.50070600 |
|                                                                                                                                 |                           | F                      | -3.35445300 | -0.13211800 | 1.23979100  |
|                                                                                                                                 |                           | F                      | -3.35893600 | -1.00525900 | -0.72916000 |
|                                                                                                                                 |                           | Br                     | -0.95591800 | 0.00023900  | -0.00332100 |
|                                                                                                                                 |                           | H                      | 5.82749300  | -0.00091400 | 0.00702200  |
| Pyr···BrCH <sub>3</sub>                                                                                                         |                           | Cartesian coordinates: |             |             |             |
| <div>E=-2862.34358661 a.u.</div> <div></div> | Graphical representation. | C                      | 3.08837400  | 1.26527200  | 0.02433000  |
|                                                                                                                                 |                           | C                      | 3.90848900  | 0.14629600  | 0.08037500  |
|                                                                                                                                 |                           | C                      | 3.32110700  | -1.11102900 | 0.04458800  |
|                                                                                                                                 |                           | C                      | 1.93632300  | -1.19254500 | -0.04557500 |
|                                                                                                                                 |                           | C                      | 1.71445900  | 1.07488900  | -0.06432700 |
|                                                                                                                                 |                           | H                      | 3.50073200  | 2.26684300  | 0.04952700  |
|                                                                                                                                 |                           | H                      | 3.91871200  | -2.01382200 | 0.08620200  |
|                                                                                                                                 |                           | N                      | 1.14014200  | -0.12637700 | -0.09933700 |
|                                                                                                                                 |                           | H                      | 1.44091200  | -2.15880300 | -0.07519200 |
|                                                                                                                                 |                           | H                      | 1.03890900  | 1.92474000  | -0.10807700 |
|                                                                                                                                 |                           | C                      | -3.93886500 | 0.11049200  | 0.08373700  |
|                                                                                                                                 |                           | H                      | -4.30073400 | 0.51365500  | -0.85896500 |
|                                                                                                                                 |                           | H                      | -4.19079600 | 0.77879900  | 0.90351400  |
|                                                                                                                                 |                           | H                      | -4.35581100 | -0.87834100 | 0.25822300  |
|                                                                                                                                 |                           | Br                     | -2.00564000 | -0.04462300 | -0.01289100 |
|                                                                                                                                 |                           | H                      | 4.98515700  | 0.25311200  | 0.15252900  |
| O <sub>2</sub> N-Pyr···ClCF <sub>3</sub>                                                                                        |                           | Cartesian coordinates: |             |             |             |
| <div>E=-1250.60356002 a.u.</div> <div></div> | Graphical representation. | C                      | -2.66047400 | 1.23032900  | -0.00068100 |
|                                                                                                                                 |                           | C                      | -3.28805800 | -0.00065200 | 0.00037800  |
|                                                                                                                                 |                           | C                      | -2.56296600 | -1.17698500 | -0.00157100 |
|                                                                                                                                 |                           | C                      | -1.17825000 | -1.05770900 | -0.00453900 |
|                                                                                                                                 |                           | C                      | -1.27046400 | 1.22382400  | -0.00378600 |
|                                                                                                                                 |                           | H                      | -3.23033600 | 2.14903800  | 0.00083200  |
|                                                                                                                                 |                           | H                      | -3.05753400 | -2.13835800 | -0.00074100 |
|                                                                                                                                 |                           | N                      | -0.54012800 | 0.11073500  | -0.00619800 |
|                                                                                                                                 |                           | N                      | -4.76959200 | -0.06091200 | 0.00317700  |
|                                                                                                                                 |                           | O                      | -5.28093600 | -1.16025700 | 0.00359400  |
|                                                                                                                                 |                           | C                      | 4.25932000  | -0.02786000 | 0.00275900  |
|                                                                                                                                 |                           | F                      | 4.78613900  | 1.18268700  | -0.13865600 |
|                                                                                                                                 |                           | F                      | 4.69620500  | -0.79300400 | -0.99085400 |
|                                                                                                                                 |                           | F                      | 4.69369400  | -0.54157900 | 1.14749100  |
|                                                                                                                                 |                           | Cl                     | 2.50277800  | 0.05777400  | -0.00870700 |
|                                                                                                                                 |                           | H                      | -0.72187700 | 2.16017100  | -0.00473300 |
|                                                                                                                                 |                           | H                      | -0.55492900 | -1.94624800 | -0.00607600 |
|                                                                                                                                 |                           | O                      | -5.36825100 | 0.99349100  | 0.00424300  |

|                                                                                                                      |  |                               |             |             |
|----------------------------------------------------------------------------------------------------------------------|--|-------------------------------|-------------|-------------|
| <b>O<sub>2</sub>N-Pyr···ClCH<sub>3</sub></b>                                                                         |  | <b>Cartesian coordinates:</b> |             |             |
| E= -952.86709191 a.u.                                                                                                |  | C                             | -1.00841700 | -0.90753400 |
|                                                                                                                      |  | C                             | -2.04589200 | 0.00516400  |
|                                                                                                                      |  | C                             | -1.80406000 | 1.36577600  |
|                                                                                                                      |  | C                             | -0.47186400 | 1.76365100  |
|                                                                                                                      |  | C                             | 0.28192800  | -0.38899400 |
|                                                                                                                      |  | H                             | -1.20006800 | -1.97151900 |
|                                                                                                                      |  | H                             | -2.61693300 | 2.07848800  |
|                                                                                                                      |  | N                             | 0.55273800  | 0.91429000  |
|                                                                                                                      |  | N                             | -3.44464100 | -0.48405300 |
|                                                                                                                      |  | O                             | -4.32616500 | 0.34906300  |
|                                                                                                                      |  | C                             | 5.48980600  | -0.74557800 |
|                                                                                                                      |  | H                             | 5.47442900  | -1.49701600 |
|                                                                                                                      |  | H                             | 5.62870600  | -1.21453200 |
|                                                                                                                      |  | H                             | 6.27793300  | -0.01975100 |
|                                                                                                                      |  | Cl                            | 3.92012600  | 0.11648500  |
|                                                                                                                      |  | H                             | 1.13899300  | -1.05488600 |
|                                                                                                                      |  | H                             | -0.22156900 | 2.81973600  |
|                                                                                                                      |  | O                             | -3.61500000 | -1.68498000 |
| 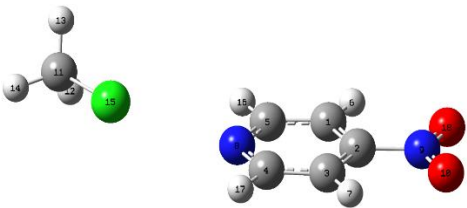 <p>Graphical representation.</p>   |  |                               |             |             |
| <b>O<sub>2</sub>N-Pyr···BrCF<sub>3</sub></b>                                                                         |  | <b>Cartesian coordinates:</b> |             |             |
| E=-3364.56836328 a.u.                                                                                                |  | C                             | 2.95383000  | -1.20190700 |
|                                                                                                                      |  | C                             | 3.63692600  | -0.00077600 |
|                                                                                                                      |  | C                             | 2.96749900  | 1.20799400  |
|                                                                                                                      |  | C                             | 1.57890200  | 1.15380600  |
|                                                                                                                      |  | C                             | 1.56600200  | -1.13194100 |
|                                                                                                                      |  | H                             | 3.48177700  | -2.14533200 |
|                                                                                                                      |  | H                             | 3.50608800  | 2.14539800  |
|                                                                                                                      |  | N                             | 0.88941000  | 0.01479100  |
|                                                                                                                      |  | N                             | 5.12004400  | -0.00919500 |
|                                                                                                                      |  | O                             | 5.68097100  | 1.06551000  |
|                                                                                                                      |  | C                             | -4.01109000 | -0.00650800 |
|                                                                                                                      |  | F                             | -4.47745200 | -0.51953500 |
|                                                                                                                      |  | F                             | -4.47805000 | -0.73742000 |
|                                                                                                                      |  | F                             | -4.49125800 | 1.22720500  |
|                                                                                                                      |  | Br                            | -2.08439100 | 0.00780100  |
|                                                                                                                      |  | H                             | 0.97322100  | -2.04098800 |
|                                                                                                                      |  | H                             | 0.99659000  | 2.06956200  |
|                                                                                                                      |  | O                             | 5.66881100  | -1.09014900 |
|  <p>Graphical representation.</p>   |  |                               |             |             |
| <b>O<sub>2</sub>N-Pyr···BrCH<sub>3</sub></b>                                                                         |  | <b>Cartesian coordinates:</b> |             |             |
| E=-3066.83541418 a.u.                                                                                                |  | C                             | 2.15443500  | 1.26493200  |
|                                                                                                                      |  | C                             | 2.71030100  | -0.00030500 |
|                                                                                                                      |  | C                             | 1.91858600  | -1.13255100 |
|                                                                                                                      |  | C                             | 0.54360100  | -0.93275800 |
|                                                                                                                      |  | C                             | 0.76699700  | 1.33894400  |
|                                                                                                                      |  | H                             | 2.77610100  | 2.14891800  |
|                                                                                                                      |  | H                             | 2.35605100  | -2.12109300 |
|                                                                                                                      |  | N                             | -0.02526100 | 0.27042200  |
|                                                                                                                      |  | N                             | 4.18467200  | -0.14563800 |
|                                                                                                                      |  | O                             | 4.63338600  | -1.27233600 |
|                                                                                                                      |  | C                             | -5.11156000 | -0.25558800 |
|                                                                                                                      |  | H                             | -5.60465800 | 0.70647900  |
|                                                                                                                      |  | H                             | -5.34290200 | -0.69278500 |
|                                                                                                                      |  | H                             | -5.40101000 | -0.92945200 |
|                                                                                                                      |  | Br                            | -3.19282100 | 0.02846400  |
|                                                                                                                      |  | H                             | 0.27207800  | 2.30461600  |
|                                                                                                                      |  | H                             | -0.13278500 | -1.78119300 |
|                                                                                                                      |  | O                             | 4.84359300  | 0.87217700  |
|  <p>Graphical representation.</p> |  |                               |             |             |

---

**ON-Pyr...ClCF<sub>3</sub>**

E=-1175.39065544 a.u.

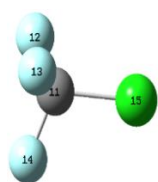

Graphical representation.

**Cartesian coordinates:**

|    |             |             |             |
|----|-------------|-------------|-------------|
| C  | -3.06056300 | -1.05119200 | -0.05032200 |
| C  | -3.68694300 | 0.18707300  | 0.01724200  |
| C  | -2.93691700 | 1.35104000  | -0.01255500 |
| C  | -1.55468000 | 1.22608100  | -0.10969400 |
| C  | -1.67756100 | -1.05869100 | -0.14605600 |
| H  | -3.63833200 | -1.96676300 | -0.02768800 |
| H  | -3.42361400 | 2.31755900  | 0.04096100  |
| N  | -0.93445500 | 0.05109600  | -0.17505500 |
| N  | -5.12842200 | 0.36147100  | 0.12255100  |
| O  | -5.75312000 | -0.66103600 | 0.15079200  |
| C  | 3.84604500  | -0.04291100 | 0.04882800  |
| F  | 4.29718500  | -1.28838400 | 0.14581200  |
| F  | 4.24869000  | 0.63110200  | 1.11999300  |
| F  | 4.39239300  | 0.51615700  | -1.02525500 |
| Cl | 2.09181100  | -0.02695300 | -0.06856300 |
| H  | -1.13458400 | -1.99705100 | -0.20128600 |
| H  | -0.91985500 | 2.10650200  | -0.13482800 |

---

**ON-Pyr...ClCH<sub>3</sub>**

E=-877.65377532 a.u.

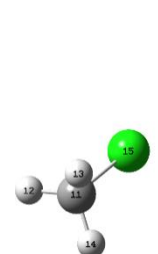

Graphical representation.

**Cartesian coordinates:**

|    |             |             |             |
|----|-------------|-------------|-------------|
| C  | 2.27139500  | 1.08381700  | -0.00126400 |
| C  | 2.39657800  | -0.30026100 | 0.00007000  |
| C  | 1.26648500  | -1.10097100 | 0.00180000  |
| C  | 0.02592400  | -0.47005500 | 0.00202300  |
| C  | 0.98641900  | 1.60450600  | -0.00076300 |
| H  | 3.14801200  | 1.71946100  | -0.00258600 |
| H  | 1.36200400  | -2.18036100 | 0.00291700  |
| N  | -0.11729900 | 0.85222300  | 0.00085100  |
| N  | 3.67040700  | -0.99975200 | -0.00018300 |
| O  | 4.63364500  | -0.28506700 | -0.00184800 |
| C  | -5.15106800 | -0.64429500 | -0.00496900 |
| H  | -5.93407700 | 0.08638200  | -0.19347100 |
| H  | -5.29699200 | -1.11347600 | 0.96525400  |
| H  | -5.13702900 | -1.39506700 | -0.79163300 |
| Cl | -3.57607700 | 0.20761200  | 0.00273100  |
| H  | 0.82903200  | 2.67867800  | -0.00168900 |
| H  | -0.89295100 | -1.04823800 | 0.00350600  |

---

**ON-Pyr...BrCF<sub>3</sub>**

E=-3289.35561628 a.u.

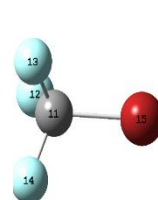

Graphical representation.

**Cartesian coordinates:**

|    |             |             |             |
|----|-------------|-------------|-------------|
| C  | -3.32364500 | -1.04455200 | -0.00543200 |
| C  | -4.00675800 | 0.16522400  | 0.00317700  |
| C  | -3.30951500 | 1.36165700  | 0.00178600  |
| C  | -1.91992300 | 1.29919800  | -0.00841500 |
| C  | -1.93882900 | -0.99126900 | -0.01503300 |
| H  | -3.86041700 | -1.98484200 | -0.00432500 |
| H  | -3.84073400 | 2.30587200  | 0.00869200  |
| N  | -1.24722500 | 0.15165600  | -0.01670500 |
| N  | -5.45924100 | 0.27572900  | 0.01429900  |
| O  | -6.03754300 | -0.77347900 | 0.01508400  |
| C  | 3.63514200  | -0.07931800 | 0.00831500  |
| F  | 4.05206200  | -1.12646400 | -0.69824900 |
| F  | 4.08965500  | -0.21201100 | 1.25130100  |
| F  | 4.17787000  | 1.01611800  | -0.51577400 |
| Br | 1.71218000  | 0.03451000  | -0.00909700 |
| H  | -1.35063800 | -1.90366400 | -0.02177600 |
| H  | -1.32402200 | 2.20650400  | -0.00990000 |

---

---

**ON-Pyr...BrCH<sub>3</sub>**

E=-2991.6222977 a.u.

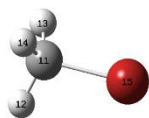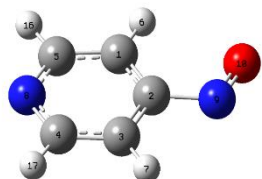

Graphical representation.

**Cartesian coordinates:**

|    |             |             |             |
|----|-------------|-------------|-------------|
| C  | -2.29227200 | -0.99860800 | 0.00018200  |
| C  | -3.09993100 | 0.13245400  | -0.00006200 |
| C  | -2.53137500 | 1.39531700  | -0.00011600 |
| C  | -1.14224500 | 1.47866500  | 0.00013000  |
| C  | -0.92068400 | -0.79848600 | 0.00032400  |
| H  | -2.72778600 | -1.98984200 | 0.00022200  |
| H  | -3.15975900 | 2.27810300  | -0.00030900 |
| N  | -0.35164500 | 0.40982500  | 0.00032800  |
| N  | -4.55359100 | 0.09014800  | -0.00028600 |
| O  | -5.02128900 | -1.01385300 | -0.00018900 |
| C  | 4.69240800  | -0.42255900 | -0.00043000 |
| H  | 5.14049800  | 0.00604300  | -0.89325600 |
| H  | 4.79952900  | -1.50433300 | -0.00185000 |
| H  | 5.14046500  | 0.00375200  | 0.89350700  |
| Br | 2.79888300  | 0.00842400  | 0.00006000  |
| H  | -0.23692400 | -1.64192400 | 0.00049100  |
| H  | -0.64537500 | 2.44368000  | 0.00013300  |

---

**HO-Pyr...ClCF<sub>3</sub>**

E=-1121.34124639 a.u.

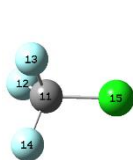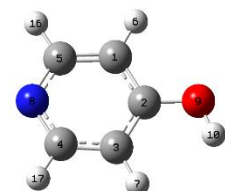

Graphical representation.

**Cartesian coordinates:**

|    |             |             |             |
|----|-------------|-------------|-------------|
| C  | -3.34308200 | -1.20718500 | 0.00000600  |
| C  | -4.05508900 | -0.01144100 | 0.01096700  |
| C  | -3.34579400 | 1.18640500  | -0.00059300 |
| C  | -1.95927800 | 1.12735000  | -0.02249700 |
| C  | -1.96014900 | -1.14290100 | -0.02173800 |
| H  | -3.86583500 | -2.15492200 | 0.00879800  |
| H  | -3.85393200 | 2.14508900  | 0.00745800  |
| N  | -1.26130600 | -0.00560500 | -0.03317300 |
| O  | -5.40323800 | -0.07442700 | 0.03261100  |
| H  | -5.77582200 | 0.80951700  | 0.03808400  |
| C  | 3.46814400  | 0.00309300  | 0.00889700  |
| F  | 3.95592300  | -0.74099600 | -0.97913200 |
| F  | 3.92330800  | -0.48511700 | 1.15871600  |
| F  | 3.93921000  | 1.23859300  | -0.13187400 |
| Cl | 1.71271900  | 0.00019400  | -0.01768000 |
| H  | -1.37831200 | -2.06013300 | -0.03035700 |
| H  | -1.38176300 | 2.04755100  | -0.03174300 |

---

**HO-Pyr...ClCH<sub>3</sub>**

E=-823.6029173 a.u.

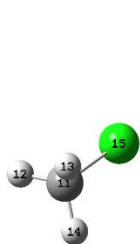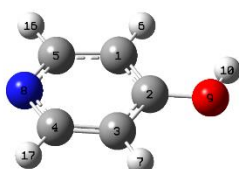

Graphical representation.

**Cartesian coordinates:**

|    |             |             |             |
|----|-------------|-------------|-------------|
| C  | 2.61421400  | 1.04458500  | 0.00623100  |
| C  | 2.80377700  | -0.33393600 | 0.00238400  |
| C  | 1.68366500  | -1.15882100 | -0.00626300 |
| C  | 0.43295000  | -0.56252600 | -0.01074300 |
| C  | 1.31181100  | 1.52756000  | 0.00098100  |
| H  | 3.45423300  | 1.73189000  | 0.01296000  |
| H  | 1.79878900  | -2.23527500 | -0.00946300 |
| N  | 0.22815300  | 0.75631900  | -0.00736000 |
| O  | 4.02466100  | -0.91474700 | 0.00679100  |
| H  | 4.70785900  | -0.24164200 | 0.01294700  |
| C  | -4.77230200 | -0.54944400 | 0.01508900  |
| H  | -5.52078500 | 0.22141300  | -0.15420200 |
| H  | -4.92482300 | -1.01578100 | 0.98589800  |
| H  | -4.81625200 | -1.29687900 | -0.77396000 |
| Cl | -3.15377600 | 0.21380100  | -0.00645800 |
| H  | 1.13758900  | 2.60003500  | 0.00385100  |
| H  | -0.46145500 | -1.17914600 | -0.01712800 |

---

---

**HO-Pyr...BrCF<sub>3</sub>**

E=-3235.30682124 a.u.

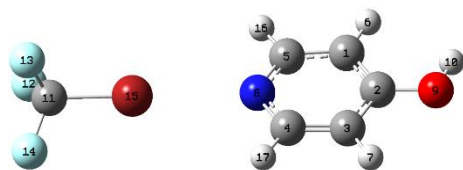

Graphical representation.

**Cartesian coordinates:**

|    |             |             |             |
|----|-------------|-------------|-------------|
| C  | -3.61258700 | -1.18759600 | 0.00017700  |
| C  | -4.32337100 | 0.00980000  | 0.00004200  |
| C  | -3.61324000 | 1.20709100  | 0.00037500  |
| C  | -2.23068700 | 1.14581500  | 0.00068700  |
| C  | -2.22665900 | -1.12765000 | 0.00097000  |
| H  | -4.11972700 | -2.14670400 | -0.00012300 |
| H  | -4.13772100 | 2.15382200  | 0.00028000  |
| N  | -1.53227100 | 0.00785900  | 0.00093100  |
| O  | -5.67072600 | 0.07137400  | -0.00057000 |
| H  | -6.04379600 | -0.81244900 | -0.00094600 |
| C  | 3.29777500  | -0.00428600 | 0.00046800  |
| F  | 3.77091100  | -1.08507900 | -0.61758900 |
| F  | 3.77412300  | -0.00173500 | 1.24420900  |
| F  | 3.77783600  | 1.06899300  | -0.62486900 |
| Br | 1.37241400  | 0.00182300  | -0.00100500 |
| H  | -1.64619800 | -2.04582100 | 0.00117800  |
| H  | -1.64853700 | 2.06266900  | 0.00076300  |

---

**HO-Pyr...BrCH<sub>3</sub>**

E=-2937.57191311 a.u.

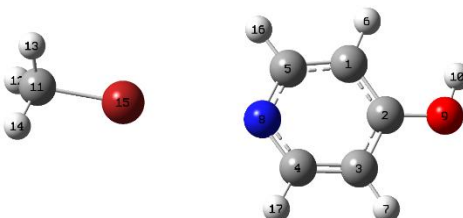

Graphical representation.

**Cartesian coordinates:**

|    |             |             |             |
|----|-------------|-------------|-------------|
| C  | 2.62422100  | -1.19496200 | -0.00538000 |
| C  | 3.45870900  | -0.08091200 | 0.00881200  |
| C  | 2.88050900  | 1.18454600  | 0.00505900  |
| C  | 1.49804400  | 1.27042100  | -0.01288100 |
| C  | 1.25190400  | -0.98586000 | -0.02241600 |
| H  | 3.02711600  | -2.20266000 | -0.00297900 |
| H  | 3.50335000  | 2.06992000  | 0.01589300  |
| N  | 0.68105600  | 0.21574900  | -0.02663200 |
| O  | 4.80713700  | -0.16528100 | 0.02639100  |
| H  | 5.07967200  | -1.08490000 | 0.02641700  |
| C  | -4.38948100 | -0.19680300 | 0.03055100  |
| H  | -4.66631300 | -0.63001000 | 0.98854100  |
| H  | -4.67123700 | -0.86163500 | -0.78231600 |
| H  | -4.85714000 | 0.77653200  | -0.09569000 |
| Br | -2.46215500 | 0.03878200  | -0.00421900 |
| H  | 0.57468100  | -1.83551500 | -0.03316000 |
| H  | 1.01736600  | 2.24431400  | -0.01621200 |

---

**H<sub>2</sub>N-Pyr...ClCF<sub>3</sub>**

E=-1101.47801621 a.u.

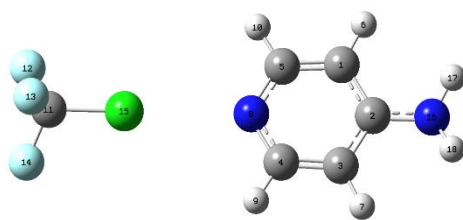

Graphical representation.

**Cartesian coordinates:**

|    |             |             |             |
|----|-------------|-------------|-------------|
| C  | 3.32474500  | 1.19366100  | -0.00602100 |
| C  | 4.05417900  | -0.00088300 | 0.00711300  |
| C  | 3.32225400  | -1.19391700 | -0.00618700 |
| C  | 1.93995300  | -1.13162500 | -0.02742600 |
| C  | 1.94230600  | 1.13423200  | -0.02730000 |
| H  | 3.82938400  | 2.15352900  | -0.00241700 |
| H  | 3.82492600  | -2.15481100 | -0.00271100 |
| N  | 1.23723600  | 0.00203100  | -0.03769800 |
| H  | 1.36145500  | -2.05157800 | -0.03612100 |
| H  | 1.36573900  | 2.05538900  | -0.03588800 |
| C  | -3.46824000 | -0.00041200 | 0.01194000  |
| F  | -3.95153100 | 1.13969400  | -0.47387900 |
| F  | -3.91768700 | -0.14253500 | 1.25583000  |
| F  | -3.95420100 | -0.99992100 | -0.71909800 |
| Cl | -1.71382700 | 0.00139900  | -0.02182000 |
| N  | 5.43032600  | -0.00232800 | -0.01281600 |
| H  | 5.90100800  | 0.84341200  | 0.26172400  |
| H  | 5.89920300  | -0.84911100 | 0.26157500  |

---

|                                                                                     |  |                               |             |             |
|-------------------------------------------------------------------------------------|--|-------------------------------|-------------|-------------|
| <b>H<sub>2</sub>N-Pyr···ClCH<sub>3</sub></b>                                        |  | <b>Cartesian coordinates:</b> |             |             |
| E=-803.73904594 a.u.                                                                |  | C                             | -2.60646400 | 1.06550800  |
| 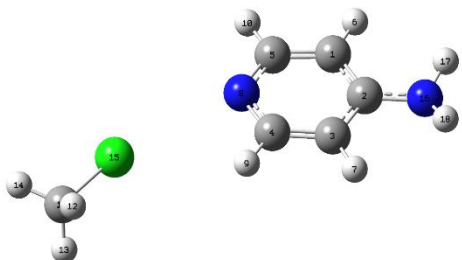   |  | C                             | -2.81675400 | -0.31708900 |
|                                                                                     |  | C                             | -1.68067200 | -1.13229000 |
|                                                                                     |  | C                             | -0.42942200 | -0.53913900 |
|                                                                                     |  | C                             | -1.30740400 | 1.54589500  |
|                                                                                     |  | H                             | -3.44257000 | 1.75586100  |
|                                                                                     |  | H                             | -1.77307500 | -2.21313300 |
|                                                                                     |  | N                             | -0.21858800 | 0.77760400  |
|                                                                                     |  | H                             | 0.46176100  | -1.16056700 |
|                                                                                     |  | H                             | -1.13363600 | 2.61875500  |
|                                                                                     |  | C                             | 4.79448200  | -0.56509800 |
|                                                                                     |  | H                             | 4.85003200  | -1.31269000 |
|                                                                                     |  | H                             | 4.93291200  | -1.03174400 |
|                                                                                     |  | H                             | 5.54636900  | 0.20490300  |
|                                                                                     |  | Cl                            | 3.17741000  | 0.19934600  |
|                                                                                     |  | N                             | -4.08613000 | -0.85367900 |
|                                                                                     |  | H                             | -4.85156900 | -0.25458600 |
|                                                                                     |  | H                             | -4.19576200 | -1.80988500 |
| Graphical representation.                                                           |  |                               |             |             |
| <b>H<sub>2</sub>N-Pyr···BrCF<sub>3</sub></b>                                        |  | <b>Cartesian coordinates:</b> |             |             |
| E=-3215.44388743 a.u.                                                               |  | C                             | 3.59164200  | 1.19446700  |
|    |  | C                             | 4.32232000  | 0.00000900  |
|                                                                                     |  | C                             | 3.59159200  | -1.19444900 |
|                                                                                     |  | C                             | 2.20988700  | -1.13463200 |
|                                                                                     |  | C                             | 2.20991000  | 1.13467800  |
|                                                                                     |  | H                             | 4.09541600  | 2.15464000  |
|                                                                                     |  | H                             | 4.09536800  | -2.15462100 |
|                                                                                     |  | N                             | 1.50807400  | 0.00004800  |
|                                                                                     |  | H                             | 1.63062800  | -2.05390900 |
|                                                                                     |  | H                             | 1.63070700  | 2.05399500  |
|                                                                                     |  | C                             | -3.29765600 | 0.00002000  |
|                                                                                     |  | F                             | -3.78001600 | 1.08282200  |
|                                                                                     |  | F                             | -3.76804900 | -0.01142400 |
|                                                                                     |  | F                             | -3.78023300 | -1.07132500 |
|                                                                                     |  | Br                            | -1.37257400 | -0.00003500 |
|                                                                                     |  | N                             | 5.69635100  | -0.00004400 |
|                                                                                     |  | H                             | 6.17278000  | 0.84728900  |
|                                                                                     |  | H                             | 6.17271200  | -0.84740100 |
| Graphical representation.                                                           |  |                               |             |             |
| <b>H<sub>2</sub>N-Pyr···BrCH<sub>3</sub></b>                                        |  | <b>Cartesian coordinates:</b> |             |             |
| E=-2917.70826178 a.u.                                                               |  | C                             | -2.85701600 | 1.17524100  |
|  |  | C                             | -3.45851400 | -0.08770800 |
|                                                                                     |  | C                             | -2.60925000 | -1.19852500 |
|                                                                                     |  | C                             | -1.24193800 | -0.99369200 |
|                                                                                     |  | C                             | -1.47674700 | 1.25916400  |
|                                                                                     |  | H                             | -3.45675700 | 2.07791600  |
|                                                                                     |  | H                             | -3.01110600 | -2.20581000 |
|                                                                                     |  | N                             | -0.66094500 | 0.20621300  |
|                                                                                     |  | H                             | -0.56928100 | -1.84641100 |
|                                                                                     |  | H                             | -0.99703100 | 2.23396700  |
|                                                                                     |  | C                             | 4.39278700  | -0.18922000 |
|                                                                                     |  | H                             | 4.86278000  | 0.78422500  |
|                                                                                     |  | H                             | 4.70591500  | -0.85968000 |
|                                                                                     |  | H                             | 4.63657000  | -0.61433700 |
|                                                                                     |  | Br                            | 2.46700700  | 0.03937700  |
|                                                                                     |  | N                             | -4.82491300 | -0.23229000 |
|                                                                                     |  | H                             | -5.39343300 | 0.56146200  |
|                                                                                     |  | H                             | -5.21784500 | -1.11854100 |
| Graphical representation.                                                           |  |                               |             |             |
